# Supplementary material
Source: MDPI journal article supplement (https://www.mdpi.com/2076-3417/14/6/2641)
Supplement: s1 [file s1]

## README.md

# The eDNA-container app

---

- [Introduction](#)
- [Running the image in a container on Windows](#)
- [Analysing paired-end sequencing data using The eDNA-container app](#)
- [Key outputs](#)
- [The taxonomic database](#)
- [Running the pipeline using terminal commands \(Windows/Linux\)](#)
- [Running the image in a container on Linux](#)
- [Building the latest version of the pipeline](#)
- [Trouble shooting](#)
- [ToDo](#)

## Introduction

---

A Docker image containing a eDNA pipeline based on [QIIME2](#). The pipeline is controlled via flask GUI that runs in the users browser.

**The advantages of the pipeline are:**

- simple to setup and run using point and click with a browser based GUI
- should run on any machine where [Docker-desktop](#) can be installed
- adaptable to any primer combination or taxonomic database
- snakemake is used to confirm successful completion of each stage of the pipeline
- species summary tables with counts are created, including the ASV sequence for manual confirmation of the taxonomic classification
- rarefaction and taxonomic barplots are generated that can be viewed using the [QIIME viewer](#) (drag and drop)
- A PDF report is generated containing QC plots and important information about the ASV generation so that QC parameters can be optimised

The pipeline can also be used without Docker as described at this [repo](#).

# Running the image in a container on Windows

Ensure that the Docker-desktop app is installed on your windows computer. The official guide for installing Docker-desktop can be found [here](#). If you run into any issues a more complete guide is available [here](#).

1. Start by opening the Docker-desktop app.
2. In the search bar at the top of the page search for `dwheelerau/edna` , then use the "Pull" button to obtain a copy of the pipeline image. Downloading the image (~7GB) will take some time depending on your internet connection.

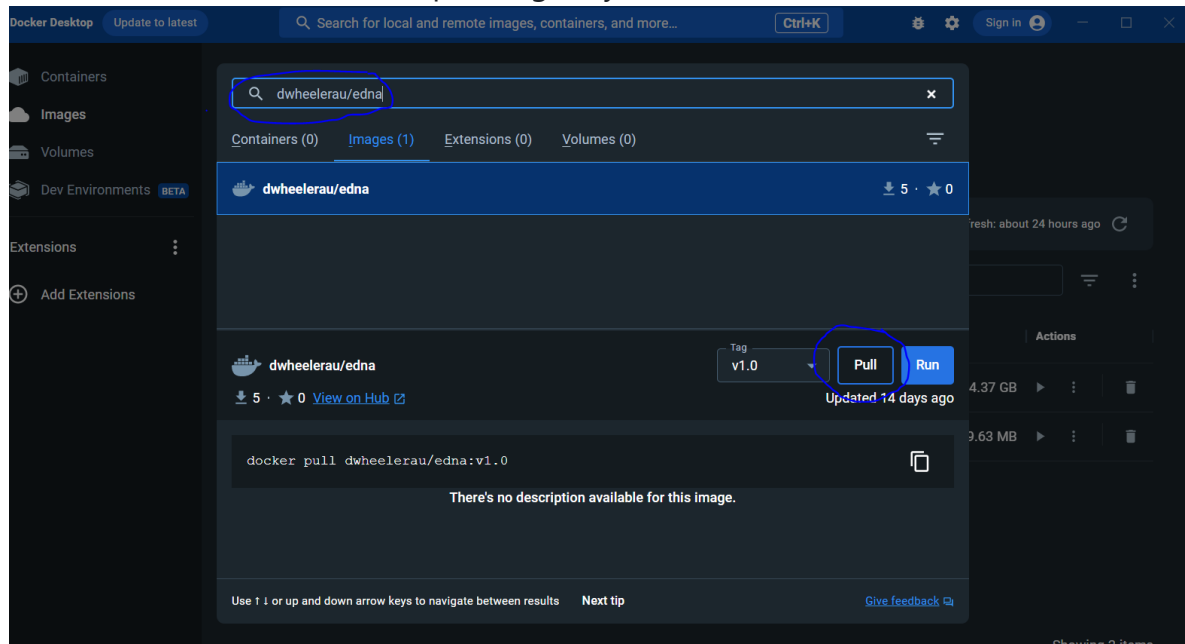

3. After the image has downloaded click the "Run" button.

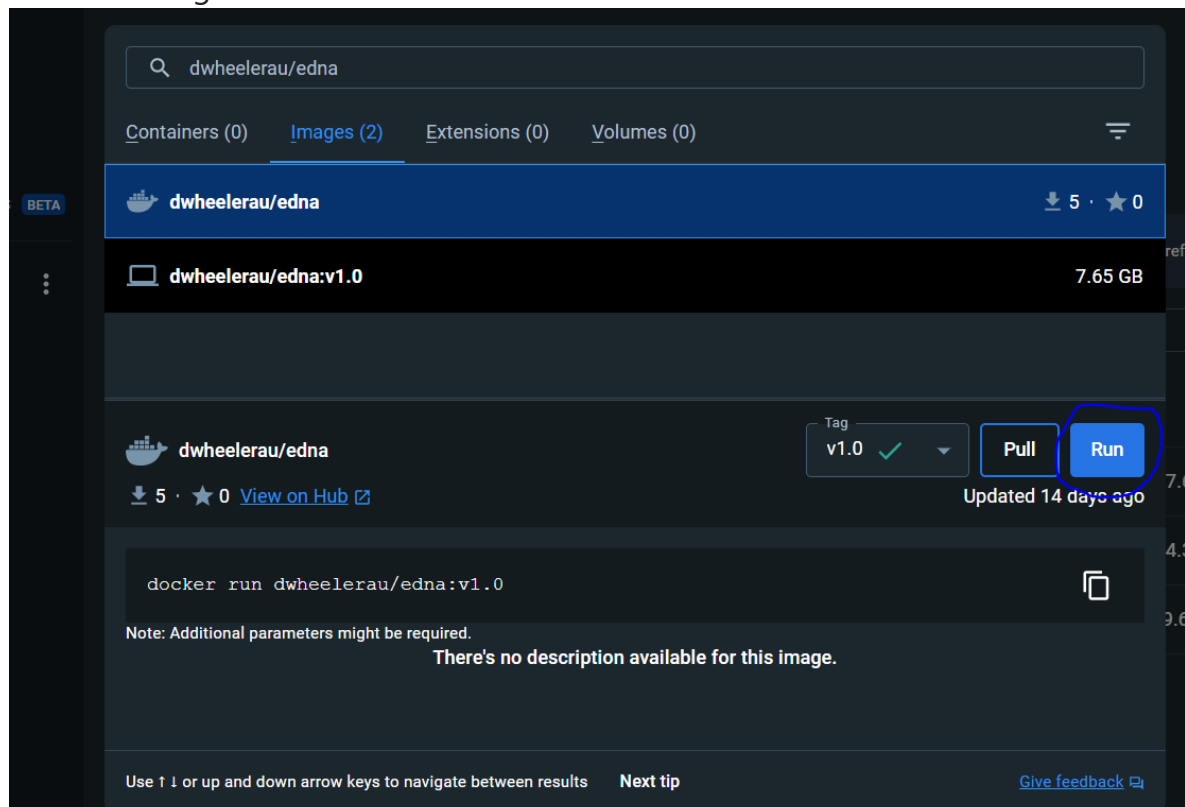

4. Use the "Optional settings" drop down to open host port 5000 as shown in the image below, then click "Run".

The screenshot shows the 'Run a new container' dialog box for the image `dwheelerau/edna:v1.0`. The 'Optional settings' section is expanded, showing the following configuration:

- Container name:** A text input field with a note: 'A random name is generated if you do not provide one.'
- Ports:** A section with a 'Host port' input field containing '5000' and a 'Container port' dropdown set to '5000/tcp'. The 'Host port' input field is highlighted with a red circle.
- Volumes:** A section with 'Host path' and 'Container path' input fields, each followed by a plus sign (+) to add more volumes.
- Environment variables:** A section with 'Variable' and 'Value' input fields, each followed by a plus sign (+) to add more environment variables.

At the bottom right, there are two buttons: 'Cancel' and 'Run'. The 'Run' button is highlighted with a red circle.

5. The log section of the container should look like the image below, this is showing the IP address for The eDNA-container app user interface, click on the top link or type `http://127.0.0.1:5000` in an internet browser (**Note:** No data is transferred over the internet, the pipeline will run using the local computer resources).

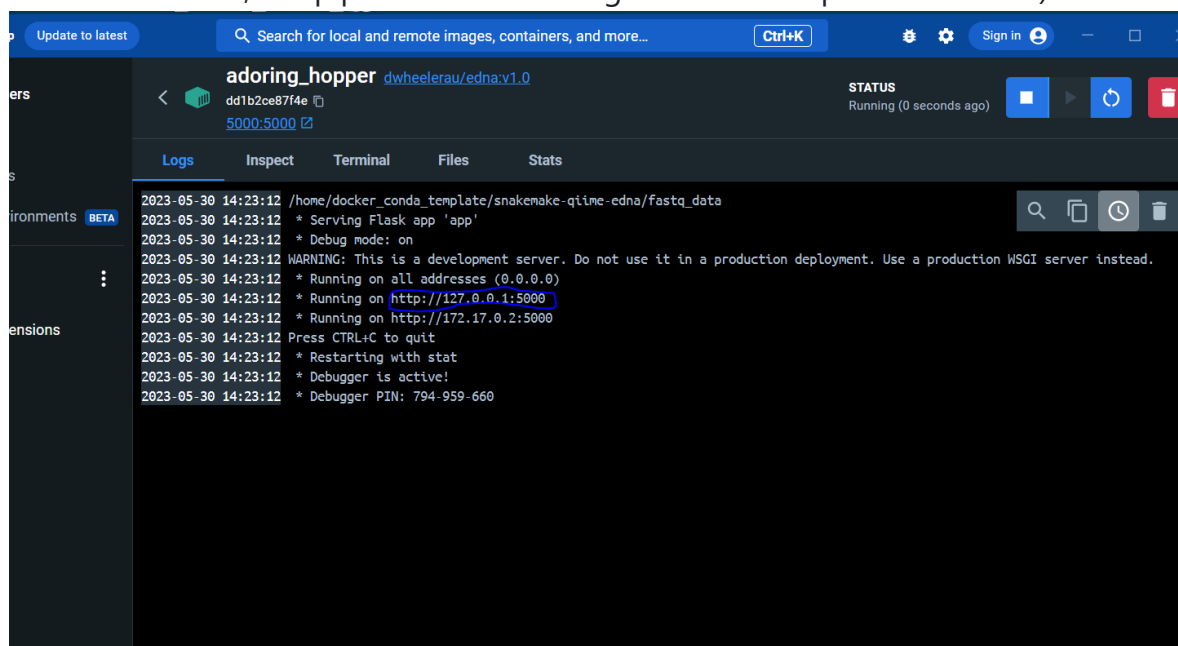

6. Please wait a few seconds while the pipeline setup beings, if this has been successful the following screen should display.

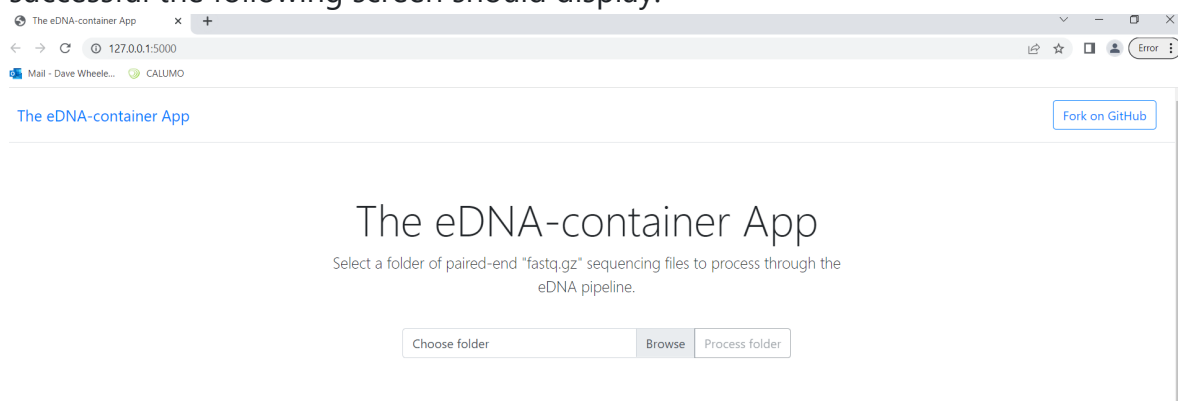

Follow the instructions below to carry out an eDNA analysis using the pipeline. **Note** for future runs on the pipeline all that is required is to click the "Play" Button next to the container ID in the Docker-desktop app. Remember to shutdown the container using the "Stop" button to free up system resources after you have completed the analysis.

## Analysing paired-end sequencing data using The eDNA-container app

The pipeline is currently only configured to process paired-end fastq.gz sequencing files. Ensure that the target directory only contains sequencing data for the samples you wish to analyse.

If this is your first time using the app, we recommend that you initially try using the test data. To do this download the [fastq\\_data](#) folder to your computer and select this when prompted by the app. This is only a small dataset so it should run reasonably quickly even on modest systems. An example of the results when the pipeline runs successfully can also be found at the previous link as a zip file. If you have any trouble running the app on this dataset please see the Trouble shooting section below.

1. Using the browser based user interface select the target folder of `fastq.gz` files that you wish to process through the pipeline and click the "Upload" button (note no data is transfered over the internet). **Important note about the infiles.** The app extracts the sample name from the sequence filenames, so you may need to rename your sequencing files so they fit the following pattern:  
`SAMPLENAME_R1_001.fastq.gz` and `SAMPLENAME_R2_001.fastq.gz` . The SAMPLENAME needs to be the same for both forward (R1) and reverse (R2) reads. It is important to include the underscore separator (`_`) between the SAMPLENAME and the R1/R2 designation. Also you must include the `_001.fastq.gz` tail in the filename as well.

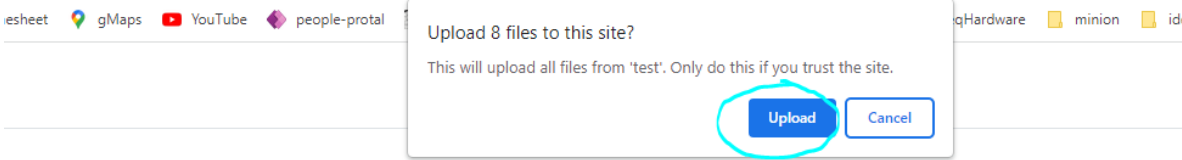

# QIIME2 based eDNA App

Select a folder of "fastq.gz" files to process through the eDNA pipeline.

Choose folder

Browse

Process folder

If you find this App useful please cite us: [ToDo](#)

2. Click the "Process folder" button to open the settings page.

[The eDNA-container App](#)

Please provide key details of the project so the pipeline will run correctly. Note defaults are reasonable settings for most projects. The primers shown are the teleo fish primers.

Project Name:

Example eDNA project

Primer information required for trimming

Forward primer (5'-3'):

ACACCGCCGTCAYYCT

Reverse primer (5'-3'):

CTCCGGTAYACTTACCRTG

For information on these settings for DADA2 see [here](#).

trunc-len-f:

0

trunc-len-r:

0

max-ee-f:

2

max-ee-r:

4

trunc-q:

2

chimera-method:

consensus

OPTIONAL: The default taxonomic database is based on [MIDORI2](#)

If you want to select another database navigate to the file using this upload button

Optionally choose a compatible QIIME2 taxonomic database \*.qza file

Browse

Run pipeline!

file:///C:/Users/wheeled/Downloads/README.html

5/13

3. The next page is the settings page, the following table details each option. **Note** be sure to set `trunc-len-f` and `trunc-len-r` to 0 when using variable length amplicons in order to avoid introducing trimming biases. We recommend running the pipeline initially with the default quality settings and then adjusting these based on the outputs presented in the `final-report.pdf` (specifically the raw read QC plots and DADA2 tables).

| Setting            | Explanation                                                                    |
|--------------------|--------------------------------------------------------------------------------|
| Project name       | A name for your project (will be used as the project title)                    |
| Forward primer     | Forward PCR primer sequence for cutadapt primer/adapter removal                |
| Reverse primer     | Reverse PCR primer sequence for cutadapt primer/adapter removal                |
| trunc-len-f        | Remove 3' end of forward read at this position due to low quality (0=no trim)  |
| trunc-len-r        | Remove 3' end of reverse read at this position due to low quality (0=no trim)  |
| max-ee-f           | Forward reads with > number expected errors will be discarded                  |
| max-ee-r           | Reverse reads with > number expected errors will be discarded                  |
| trunc-q            | Truncate reads at first instance of quality score <= value                     |
| chimera-method     | chimera removal method: consensus, pooled, or none                             |
| Taxonomic database | File location for a QIIME2 compatible (.qza) naive_bayes classifier (optional) |

Table describing the key settings; for additional information see the [DADA2](#) and [naive\\_bayes classifier](#) pages. A classifier based on the MIDORI2 database (12S rRNA) and the Telo fish primer amplicon is provided as a default (F:5'ACACCGCCCGTCAYYCT3'/R:5'CTCCGGTAYACTTACCRTG3').

4. When you are ready click the "Run pipeline!" command to start the analysis. A data submitted screen (below) will be replaced by a Download data link once the pipeline has completed. As noted before this analysis is performed on your own computer inside your local Docker environment with the download link a shortcut

to data stored inside the eDNA-container app.

Pipeline is finished!

Click on the link below to download the results.

[Download Link](#)

If you found this App useful please cite us: [ToDo](#)

Click [here](#) to re-run the pipeline.

A summary of the key outputs are below. If your analysis fails you will be notified by a message on the user interface, if this occurs see the FAQ. Any file ending in .qzv can be viewed by drag and drop into the [QIIME2 viewer](#). You can also test the pipeline using the defaults with the example data in the testing\_data folder.

## Key outputs

| file path                                    | Explanation                                                       |
|----------------------------------------------|-------------------------------------------------------------------|
| final_results/final-report.pdf               | A PDF report describing some key outputs from your run            |
| final_results/asv_count_tax_seqs_summary.csv | Final spreadsheet of eDNA taxa counts                             |
| final_results/barchart.qzv                   | species barplot                                                   |
| final_results/alpha_rarefaction.qzv          | Alpha diversity rarefaction plot viewable using the qiime2 viewer |
| paired-end-demux.qzv                         | Read quality plots viewable using the qiime2 viewer               |
| final_results/asvs                           | Amplified Sequence Variant files                                  |
| logs                                         | DADA2 and cutadapt plugin log files                               |
| Report_data/boxplot-forward.png              | Boxplot of forward read used in report                            |

| file path                       | Explanation                                              |
|---------------------------------|----------------------------------------------------------|
| Report_data/boxplot-reverse.png | Boxplot of reverse read used in report                   |
| manifest/manifest.tsv           | Sample metadata used to assign sequence files to samples |

## The taxonomic database

A classifier based on the MIDORI2 database (12S rRNA) and the Telo fish primers (F:5'ACACCGCCCGTCAYYCT3'/R:5'CTTCCGGTAYACTTACCRTG3') amplicon is provided as a default database. This database was built using only the amplicon generated using this primer combination, so if you have used another primer set you will need to build your own database or obtain a pre-built `qza` database file from a reliable source (ie [Silva 16S sequences](#) and [Taxonomy](#)).

Building a custom database requires two files, the first being the reference library of sequence barcodes in FASTA format, and the second being a corresponding taxonomy file with IDs that match the FASTA headers. Please see the [QIIME2 documentation] (<https://library.qiime2.org/plugins/q2-feature-classifier/3/>) for additional information on building a custom database `qza` file that is compatible with the eDNA app. We have also provided an example [script](#) that demonstrates the basic workflow.

## Running the pipeline using terminal commands (Windows/Linux)

If you are comfortable using the command line and Docker is installed the following can be used to run the pipeline without the user interface.

```
docker pull dwheelerau/edna
```

Downloading the image (~7GB) will take some time depending on your internet connection.

4. The image should appear in your Docker desktop app under the 'images' section (see screen shot below). Click the copy icon next to the image id code as shown below (this code will be used in the next command).



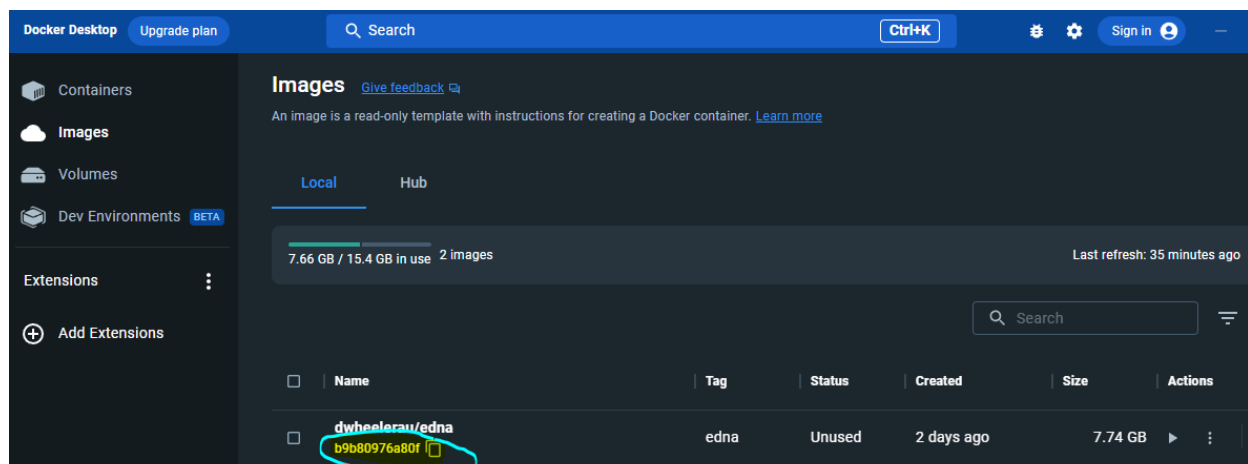

5. Type the following command in the terminal window replacing "IMAGEID" with the code you copied above (you can "paste" by right clicking on the command prompt window boarder and selecting edit->paste).

```
docker run -p 80:5000 --rm IMAGEID
```

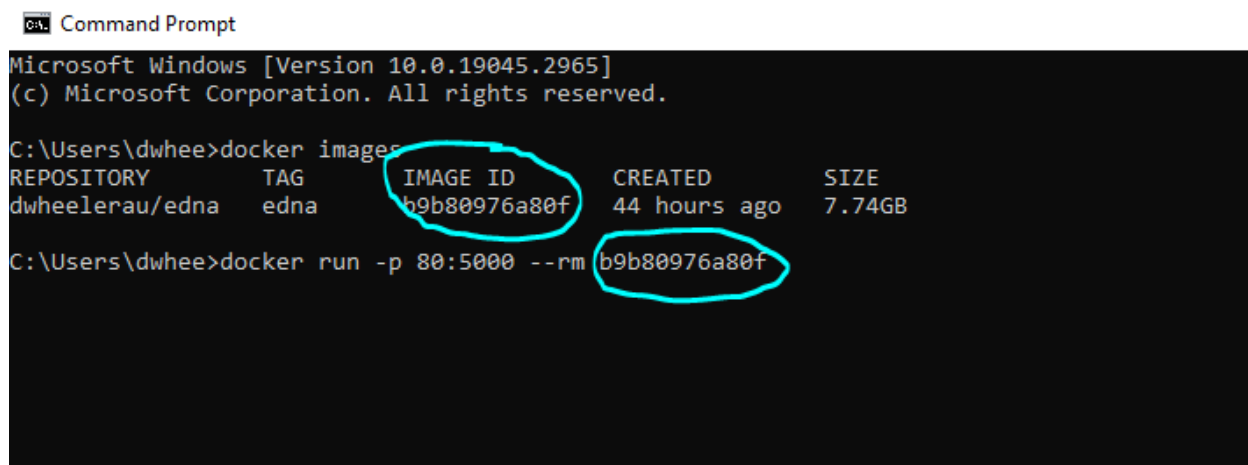

6. Open a internet browser (we recommend chrome or firebox) and enter the following IP address

```
http://127.0.0.1:80
```

The following window should open (after a short wait for the app to start). Any errors during the run should appear in the command prompt window.

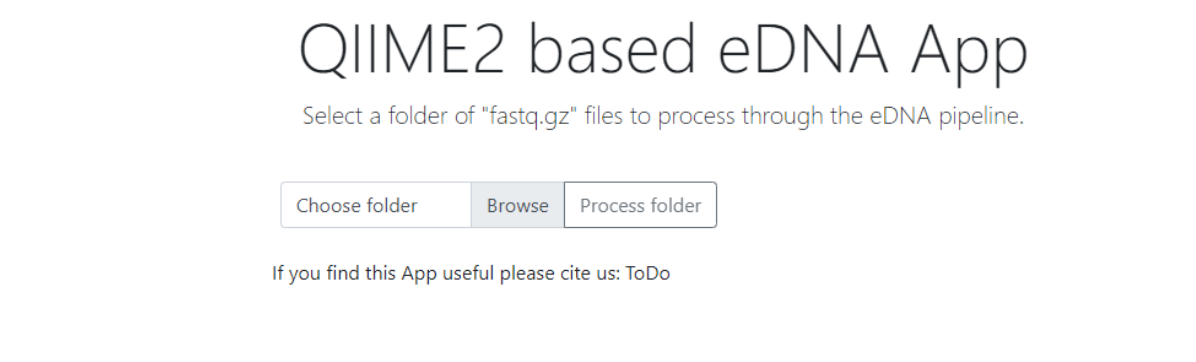

7. Using the 'select' or 'browse' button select the folder where the fastq.gz sequencing files for this project are located and accept the image upload dialogue.

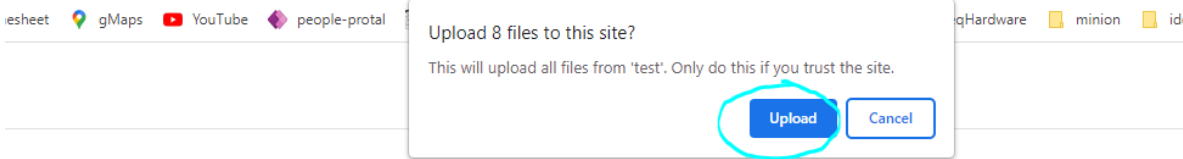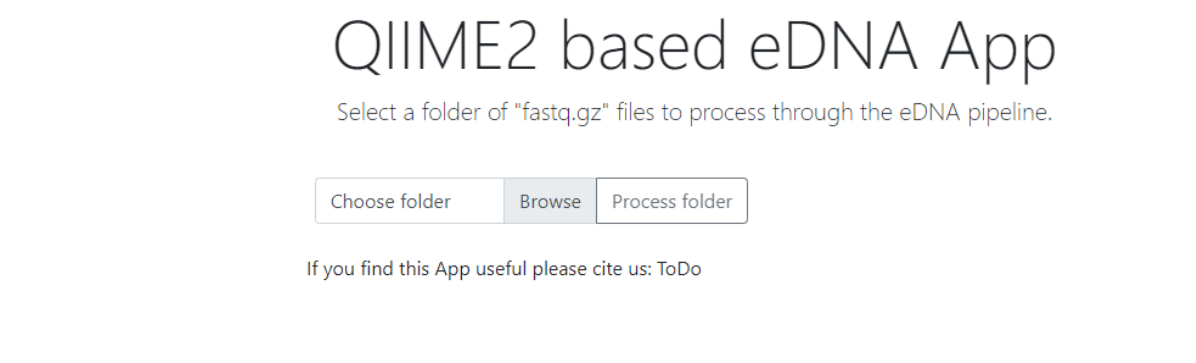

8. Click 'process folder' button and update the settings on the next page as required (the default if the telo fish eDNA primers)

Please provide key details of the project so the pipeline will run correctly. Note defaults are reasonable settings for most projects. The primers shown are the teleo fish primers.

Project Name:

Primer information required for trimming

Forward primer (5'-3'):

Reverse primer (5'-3'):

For information on these settings for DADA2 see [here](#).

trunc-len-f:

trunc-len-r:

max-ee-f:

max-ee-r:

trunc-q:

chimera-method:

**This is the path to the classifier database (please make sure this file exists)**

classifier (Please do not modify):

9. When you are ready use the 'Run pipeline!' button to run the application on your data (the progress will be logged to the command prompt terminal window).

```

Command Prompt - docker run -p 80:5000 --rm b9b80976a80f
Forward read trimming primers
^ACACCGCCCGTCAYYCT...CAYGGTAAGTRTACCGGAAG
Reverse read trimming primers
^CTTCCGGTAYACTTACCRGT...AGRRTGACGGGCGGTGT
Using p-error-rate=0.1 and p-overlap=3
Saved Visualization to: ./qiime2/loci/paired-end-demux-trimmed.qzv
Extracted ./qiime2/loci/paired-end-demux-trimmed.qza to directory fastq_data_trimmed/b993258e-2798-4bce-823b-ab2bfd1c0f
[Thu May 18 04:41:06 2023]
Finished job 8.
4 of 12 steps (33%) done
Select jobs to execute...

[Thu May 18 04:41:06 2023]
rule clean_reads:
  input: qiime2/loci/paired-end-demux-trimmed.qza
  output: qiime2/loci/asvs/stats-dada2.qzv
  jobid: 7
  reason: Missing output files: qiime2/loci/asvs/stats-dada2.qzv; Input files updated by another job: qiime2/loci/pai
  resources: tmpdir=/tmp

Using the following DADA2 params:
--p-trunc-len-f 0
--p-trunc-len-r 0
--p-max-ee-f 2
--p-max-ee-r 4
--p-trunc-q 2
--p-chimera-method consensus
  
```

10. A running screen will be replaced by a download link to the results (zipped folder). Any errors will be reported in the command prompt window.

Pipeline is finished!

Click on the link below to download the results.

[Download Link](#)

If you found this App useful please cite us: [ToDo](#)

Click [here](#) to re-run the pipeline.

If you wish to re-use the pipeline in the future, simply open the Docker-desktop app and follow the instructions from Step 5.

## Running the image in a container on Linux

1. Make sure you have Docker installed on your OS
2. Pull the image from a terminal window

```
docker pull dwheelerau/edna:edna
```

3. Find out the image ID using

```
docker images
```

4. Run the image replacing IMAGEID with the number in the first column from the above command.

```
docker run -p 80:5000 --rm IMAGEID
```

5. Open a firefox/chrome browser window and navigate to the following IP address (or localhost on port 80):

```
http://127.0.0.1:80
```

The app should open in the browser after a short delay. Any errors during pipeline running should appear in the terminal window.

6. Follow the instructions from step 7 in the windows section above.

## Building the latest version of the pipeline

---

Quick start after cloning this repository:

```
cd edna-contained  
sudo docker build -f Dockerfile . -t dwheelerau/edna:edna
```

Once the image is stored on your computer the `docker run` command can be used to run the app.

## Trouble shooting

---

**Key outputs are not included in the ZIP file?** The most likely explanation is that the analysis has failed. Error message will be printed to the Docker terminal window (logs tab), check here for any messages. The success or otherwise of each rule in the pipeline should highlight what went wrong. If the PDF report is generated also check the results in the tables, if they report that 0% reads passed filtering then this would indicate an issue with the filtering and QC settings. The most common errors are:

- Overly stringent trimming removing the region of overlap between the forward and reverse read
- Overly stringent quality trimming removing the region of overlap between the forward and reverse read
- providing a taxonomic sequence database that does not overlap your amplicon

- incorrect primer sequences provided (the app will discard all reads which don't contain the expected primers)

**The dada2 step keeps failing.** This is the most resource intensive step of the pipeline and it can fail if the host computer does not have enough memory to process the provided data. One solution here is to make more memory available to Docker by changing the memory settings (under resources in the settings) in docker desktop. If this does not work you may need to access a more powerful computer.

Another common reason for the dada2 step to fail is that there are no ASV's available after QC and trimming. This could be caused by over-stringent QC settings, or due to providing the incorrect primer sequences during the setup process for the app.

## ToDo

---

- Building database help
