# Supplementary material
Source: MDPI journal article supplement (https://www.mdpi.com/2076-3417/14/6/2641)
Supplement: s1 [file s1]

Archive with 5 entries (5 files):
- Supplemental_figs.pdf
- Supplemental_file_S1.pdf
- Supplemental_file_S2.pdf
- Supplemental_file_S3.csv
- Supplemental_file_S4.xlsx
