# Supplementary material
Source: MDPI journal article supplement (https://www.mdpi.com/2076-3417/14/6/2641)
Supplement: s1 [file s1 › Supplemental_file_S3.csv]

Taxon	11479674	11479675	11479676	11479677	11479678	11479680	11479681	11479682	11479683	11479769	11479770	11479771	11479772	11479773	11479774	Taxa_confidence	Reference_variants	reference_sequence
Unassigned	9.0	6790.0	1724.0	0.0	0.0	0.0	164.0	2.0	217.0	0.0	0.0	415.0	275.0	336.0	0.0	0.47538097879157704	5	ACTATGCCTGGCCCTAAATCTTGATACTTACCCTACCGAAGTATCCGCCAGAGAACTACGAGCACAAACGCTTAAAACTCTAAGGACTTGGCGGTGCCCTAAACCCACCTAGAGGAGCCTGTTCTA
s__Acrocephalus scirpaceus	0.0	0.0	0.0	0.0	0.0	0.0	0.0	0.0	0.0	0.0	0.0	0.0	515.0	5.0	0.0	0.999974166382971	1	ACTATGCCTGGCCCTAAATCTTGATGCTTAACCTTACCGAAGCATCCGCCCGAGAACTACGAGCGCAAACGCTTAAAACTCTAAGGACTTGGCGGTGCCCCAAACCCAC
s__Barbatula barbatula	0.0	5.0	346.0	0.0	0.0	0.0	0.0	0.0	0.0	0.0	631.0	0.0	0.0	0.0	0.0	0.9736764071249856	1	ACTATGCTCAGCCGTAAACCTAGACGTTATACCACTATAAACGTCCGCCCGGGTACTACGAGCGTTAGCTTAAAACCCAAAGGACTTGGCGGTGCCTTAGACCCCCCTAGAGGAGCCTGTTCTA
s__Bos taurus	0.0	0.0	0.0	0.0	0.0	0.0	0.0	0.0	0.0	0.0	0.0	0.0	1301.0	13.0	0.0	0.7285974203780663	1	TCTATGCTTAGCCCTAAACCCTAACAGTTACATTAACAAAACCATTCGCCAGAGTACTACAAGCAACAATTTAAAACTCAAAGGACTTGGTGGTGCTTTATATCCCTCTAGAGGAGCCTGTTCTA
s__Carassius carassius	1416.0	19.0	582.0	0.0	1720.0	962.0	108.0	0.0	0.0	0.0	997.0	0.0	647.0	0.0	654.0	0.9624653725823487	2	ACTATGCTCAGCCGTAAACTTAGACATCCTACTACAATAGATGTCCGCCAGGGTACTACGAGCATTAGCTTAAAACCCAAAGGACCTGACGGTGTCTCAGATCCCCCTAGAGGAGCCTGTTCTA
s__Columba livia	3.0	2637.0	0.0	0.0	0.0	0.0	0.0	0.0	0.0	0.0	0.0	0.0	0.0	0.0	0.0	0.9999861103608191	3	ACTATGCCTGGCCCTAAATCTTGATGCTCTATATAACCAAAGCATCCGCCTGAGAACTACGAGCACAAACGCTTAAAACTCTAAGGACTTGGCGGTGCCCCAAACCCAC
s__Ctenopharyngodon idella	875.0	3216.0	203.0	450.0	0.0	1216.0	126.0	520.0	211.0	0.0	1056.0	0.0	658.0	0.0	0.0	0.9794144704315272	3	ACTATGCTCAGCCATAAACCTAGACATCCAACTACAATTAAACGTCCGCCCGGGTACTACGAGCATTAGCTTGAAACCCAAAGGACCTGACGGTGCCTTAGACCCCCCTAGAGGAGCCTGTTCTA
s__Cyprinus carpio	12233.0	31197.0	14898.0	13404.0	35400.0	14165.0	9095.0	23710.0	8449.0	16931.0	23846.0	12229.0	9228.0	33504.0	12410.0	0.9998476441801717	15	ACTATGCTCAGCCGTAAACTCAGACATCCAGCTACAATTAGATGTCCGCCAGGGTACTACGAGCATTAGCTTAAAACCCAAAGGACCTGACGGTGTCTCAGACCCCCCTAGAGGAGCCTGTTCTA
s__Fulica atra	0.0	0.0	0.0	962.0	5.0	0.0	0.0	0.0	0.0	0.0	1087.0	720.0	9.0	4776.0	4.0	0.9980296850222405	5	ACTATGCTTGGCCCTAAATCTAGATACTTCTTCCCCACTAAAGTATCCGCCTGAGAACTACGAGCACAAACGCTTAAAACTCTAAGGACTTGGCGGTGCTCCAAACCCAC
s__Homo sapiens	6.0	4548.0	468.0	0.0	1022.0	2.0	160.0	590.0	190.0	2076.0	5766.0	2873.0	1373.0	17.0	2414.0	0.9999999999844239	7	ACTATGCTTAGCCCTAAACCTCAACAGTTAAATCAACAAAACTGCTCGCCAGAACACTACGAGCCACAGCTTAAAACTCAAAGGACCTGGCGGTGCTTCATATCCCTCTAGAGGAGCCTGTTCTA
s__Lepomis gibbosus	0.0	1593.0	1490.0	2396.0	7998.0	2643.0	258.0	2016.0	1496.0	1179.0	4181.0	3505.0	2600.0	8489.0	1079.0	0.9999025475805655	6	ACTATGCCTAGCCCTAAACATTGGTAACACCCTACATCTGTTGCCCGCCAGGAAACTACGAGCATTAGCTTAAAACCCAAAGGACTTGGCGGTGCTTTAGATCCACCTAGAGGAGCCTGTTCTA
s__Leuciscus idus	133.0	0.0	1252.0	0.0	0.0	0.0	0.0	240.0	575.0	0.0	1845.0	0.0	0.0	1843.0	0.0	0.9503081489972338	3	ACTATGCTCGGCCATAAACCTAGACGTCCAGCTACAATTAGACGTCCGCCCGGGTACTACGAGCATTAGCTTGAAACCCAAAGGACCTGACGGTGCCTTAGACCCCCCTAGAGGAGCCTGTTCTA
s__Leuciscus leuciscus	1161.0	3123.0	2273.0	560.0	3338.0	379.0	374.0	643.0	732.0	1470.0	4260.0	336.0	1559.0	2243.0	2739.0	0.9631519847214883	6	ACTATGCTCGGCCGTAAACCTAGACGTCCAGCTACAATTAGACGTCCGCCCGGGTACTACGAGCATTAGCTTGAAACCCAAAGGACCTGACGGTGCCTTAGACCCCCCTAGAGGAGCCTGTTCTA
s__Lissotriton helveticus	0.0	0.0	0.0	4.0	2482.0	0.0	0.0	0.0	0.0	0.0	0.0	0.0	0.0	0.0	0.0	0.9999886205043537	3	ACTGGGATTAGATACCCCACTATGCCAGCCATAAACTTTGACCTATCCGCCAGAGTACTACGAGCAACAGCTTAAAACTCAAAGGACTTGGCGGTGCCCTATACCCACCTAGAGGAGCCTGTTCTA
s__Lissotriton vulgaris	2914.0	17.0	272.0	0.0	0.0	506.0	157.0	0.0	0.0	0.0	1156.0	0.0	0.0	0.0	0.0	0.9999757653330755	4	ACTGGGATTAGATACCCCACTATGCCTAGTCATAAACTTTGATTTCATCCGCCAGAGTACTACGAGCAACAGCTTAAAACTCAAAGGACTTGGCGGTGCTCTATACCCCCCTAGAGGAGCCTGTTCTA
s__Lota lota	0.0	207.0	0.0	909.0	9.0	516.0	196.0	0.0	0.0	0.0	0.0	324.0	933.0	1103.0	576.0	0.9999999983562065	8	ACTATGTATGGTTGTTAACATTGATGGTTTTATACTTAAACCATCCGCCTGGGTACTACGAGCATTAGCTTAAAACCCAAAGGACTTGGCGGTGCTTTAGACCCCCCTAGAGGAGCCTGTTCTA
s__Phoxinus phoxinus	0.0	0.0	481.0	0.0	2154.0	937.0	620.0	1302.0	232.0	750.0	613.0	125.0	435.0	4.0	365.0	0.9999994862997444	4	ACTATGCTCAGTCATAAACCTAGACGTCCTACTACAGCTAGACGTCCGCCCGGGTACTACGAGCGCTTGGCTTGAAACCCAAAGGACCTGACGGTGCCTCAGACCCCCCTAGAGGAGCCTGTTCTA
s__Rana catesbeiana	1758.0	11.0	0.0	0.0	0.0	0.0	0.0	0.0	0.0	0.0	0.0	0.0	0.0	0.0	0.0	0.9999012683624053	4	ACTGGGATTAGATACCCCACTATGCCTAGCCGTAAACAATTAATTTACACCAATAAGCGCCAGGGAATTACGAGCAATGCTTAAAACCCAAAGGATTTGACGGTGTCCCACCCCACTAGAGGAGCCTGTTCTA
s__Rhodeus amarus	0.0	1350.0	0.0	0.0	0.0	0.0	228.0	0.0	0.0	0.0	0.0	0.0	0.0	0.0	0.0	0.9999684170622134	1	ACTATGCTCAGCCATAAACCCAGACATTTTTATACAACACATGTCCGCCAGGGTACTACGAGCATTAGCTTAAAACCCAAAGGACCTGACGGTGCCTCAGACCCCCCTAGAGGAGCCTGTTCTA
s__Triturus cristatus	0.0	0.0	0.0	0.0	0.0	0.0	0.0	1534.0	0.0	0.0	0.0	677.0	0.0	0.0	0.0	0.9999468486368228	4	ACTGGGATTAGATACCCCACTATGCCTAGCTATAAACTTTGACCCATATCCGCCAGAGTACTACGAGCAACAGCTTAAAACTCAAAGGACTTGGCGGTGCTCTACACCCACCTAGAGGAGCCTGTTCTA
