# Supplementary material
Source: MDPI journal article supplement (https://www.mdpi.com/2076-3417/14/6/2641)
Supplement: s1 [file s1 › Supplemental_file_S4.xlsx]

## Sheet: Comparison of Samples
Class	Order	Family	Scientific Name	Common Name	Ave. Confidence	Water area	Habitat	DepthS	DepthD	IUCN Red List Status	Importance in Fisheries	Threat to Humans	11479674_	11479675_	11479676_	11479677_	11479678_	11479680_	11479681_	11479682_	11479683_	11479769_	11479770_	11479771_	11479772_	11479773_	11479774_
Actinopteri	Centrarchiformes	Centrarchidae	Lepomis gibbosus	Pumpkinseed	HIGH	Fresh Water; Brack Water;	benthopelagic	0	41	Least Concern	subsistence fisheries	potential pest	21	6843	6319	9063	30257	9978	943	7264	5582	4399	16521	14463	11096	36099	4403
Actinopteri	Cypriniformes	Acheilognathidae	Rhodeus amarus	European bitterling	HIGH	Fresh Water;	benthopelagic	0		Least Concern	of no interest	harmless	23	7075	0	0	0	0	1135	0	0	0	0	0	0	0	0
Actinopteri	Cypriniformes	Cyprinidae	Cyprinus carpio	Common carp	HIGH	Fresh Water; Brack Water;	benthopelagic	0	29	Not Available	highly commercial	potential pest	55537	139898	68294	55306	149722	58461	37470	95831	34982	72669	104015	52542	42668	156244	56762
Actinopteri	Cypriniformes	Cyprinidae	Carassius carassius	Crucian carp	MODERATE	Fresh Water; Brack Water;	demersal	5		Least Concern	highly commercial	potential pest	7626	0	3374	0	8169	4762	667	0	0	0	5462	0	3120	0	3307
Actinopteri	Cypriniformes	Leuciscidae	Leuciscus leuciscus	Common dace	MODERATE	Fresh Water; Brack Water;	benthopelagic	1		Least Concern	of no interest	potential pest	6174	14822	11036	2363	14369	1602	1796	2924	3368	7236	19749	1556	7479	10848	12967
Actinopteri	Cypriniformes	Leuciscidae	Leuciscus idus	Ide	MODERATE	Fresh Water; Brack Water;	benthopelagic	15		Least Concern	commercial	harmless	0	0	6084	0	0	0	0	1224	2681	0	8236	0	0	8789	0
Actinopteri	Cypriniformes	Leuciscidae	Blicca bjoerkna	White bream	LOW	Fresh Water; Brack Water;	demersal	0		Least Concern	minor commercial	harmless	0	0	1433	0	0	0	464	1098	597	910	2963	267	0	0	0
Actinopteri	Cypriniformes	Leuciscidae	Phoxinus phoxinus	Eurasian minnow	HIGH	Fresh Water; Brack Water;	demersal			Least Concern	minor commercial	potential pest	0	0	1164	0	4947	2073	2595	5800	887	3521	2927	602	1076	9	895
Actinopteri	Cypriniformes	Nemacheilidae	Barbatula barbatula	Stone loach	MODERATE	Fresh Water;	demersal			Least Concern	minor commercial	harmless	0	10	1640	0	0	0	0	0	0	0	2703	0	0	0	0
Actinopteri	Cypriniformes	Xenocyprididae	Ctenopharyngodon idella	Grass carp	MODERATE	Fresh Water; Brack Water;	benthopelagic	0	30	Not Evaluated	minor commercial	potential pest	4014	15138	955	1992	21	5439	621	2347	945	0	4882	0	3068	32	0
Actinopteri	Gadiformes	Lotidae	Lota lota	Burbot	HIGH	Fresh Water; Brack Water;	demersal	1	700	Least Concern	commercial	harmless	0	976	0	4139	53	2476	927	0	0	0	0	1649	4793	5425	2793
Followings are non-fish species
Amphibia	Caudata	Salamandridae	Lissotriton vulgaris		HIGH								12613	74	1303	0	0	2061	589	0	0	12	5258	0	0	0	0
Amphibia	Anura	Ranidae	Rana catesbeiana		HIGH								7302	53	0	0	0	0	0	0	0	0	0	0	0	0	0
Amphibia	Caudata	Salamandridae	Lissotriton helveticus		HIGH								0	0	0	16	10046	0	0	0	0	0	0	0	0	0	0
Amphibia	Caudata	Salamandridae	Triturus cristatus		HIGH								0	0	0	0	0	0	0	5938	0	0	8	2854	0	0	0
Aves	Anseriformes	Anatidae	Anas platyrhynchos		LOW								31	15148	3772	0	0	0	596	0	937	0	0	1652	498	733	0
Aves	Columbiformes	Columbidae	Columba livia		HIGH								12	6345	0	0	0	0	0	0	0	0	0	0	0	0	0
Aves	Gruiformes	Rallidae	Fulica atra		HIGH								0	0	0	1999	13	0	0	0	0	0	2092	0	17	9832	8
Aves	Passeriformes	Sylviidae	Acrocephalus scirpaceus		HIGH								0	0	0	0	0	0	0	0	0	0	0	0	1170	0	0
Mammalia	Primates	Hominidae	Homo sapiens		HIGH								43	22337	2143	0	3961	0	597	2364	771	8667	24032	11999	6373	79	10537

## Sheet: List of Sample Details
Sample name	Species	Total read	Representative Sequence	Haploid ID	Size	Confidence	Identity(%)	LOD Score	Align Len	Mismatch	2nd-sp Name	2nd-sp Align Len	2nd-sp Mismatch	Sequence
11479674_	Cyprinus carpio	55537	ACTATGCTCAGCCGTAAACTCAGACATCCAGCTACAATTAGATGTCCGCCAGGGTACTACGAGCATTAGCTTAAAACCCAAAGGACCTGACGGTGTCTCAGACCCCC	Zotu1	55537	HIGH	100		107	0				ACTATGCTCAGCCGTAAACTCAGACATCCAGCTACAATTAGATGTCCGCCAGGGTACTACGAGCATTAGCTTAAAACCCAAAGGACCTGACGGTGTCTCAGACCCCC
11479674_	Lissotriton vulgaris	12613	ACTATGCCTAGTCATAAACTTTGATTTCATCCGCCAGAGTACTACGAGCAACAGCTTAAAACTCAAAGGACTTGGCGGTGCTCTATACCCCC	Zotu2	12613	HIGH	100		92	0				ACTATGCCTAGTCATAAACTTTGATTTCATCCGCCAGAGTACTACGAGCAACAGCTTAAAACTCAAAGGACTTGGCGGTGCTCTATACCCCC
11479674_	Rana catesbeiana	7302	ACTATGCCTAGCCGTAAACAATTAATTTACACCAATAAGCGCCAGGGAATTACGAGCAATGCTTAAAACCCAAAGGATTTGACGGTGTCCCACCCCA	Zotu3	7302	HIGH	100		97	0				ACTATGCCTAGCCGTAAACAATTAATTTACACCAATAAGCGCCAGGGAATTACGAGCAATGCTTAAAACCCAAAGGATTTGACGGTGTCCCACCCCA
11479674_	Leuciscus leuciscus	6174	ACTATGCTCGGCCGTAAACCTAGACGTCCAGCTACAATTAGACGTCCGCCCGGGTACTACGAGCATTAGCTTGAAACCCAAAGGACCTGACGGTGCCTTAGACCCCC	Zotu5	6174	MODERATE	100	0.69	107	0	Leuciscus idus	107	1	ACTATGCTCGGCCGTAAACCTAGACGTCCAGCTACAATTAGACGTCCGCCCGGGTACTACGAGCATTAGCTTGAAACCCAAAGGACCTGACGGTGCCTTAGACCCCC
11479674_	Carassius carassius	7626	ACTATGCTCAGCCGTAAACTTAGACATCCTACTACAATAGATGTCCGCCAGGGTACTACGAGCATTAGCTTAAAACCCAAAGGACCTGACGGTGTCTCAGATCCCC	Zotu4	6070	MODERATE	100	0.69	106	0	Carassius gibelio	106	1	ACTATGCTCAGCCGTAAACTTAGACATCCTACTACAATAGATGTCCGCCAGGGTACTACGAGCATTAGCTTAAAACCCAAAGGACCTGACGGTGTCTCAGATCCCC
				Zotu7	1556	LOW	99.06	0.41	106	1	Carassius gibelio	106	2	ACTATGCTCAGCCGTAAACTTAGACATCCTACTACAATAGATGTCCGCCAGGGTACTACGAGCATTAGCTTAAAACCCAAAGGACCTGACGGTGTCTCAGACCCCC
11479674_	Ctenopharyngodon idella	4014	ACTATGCTCAGCCATAAACCTAGACATCCAACTACAATTAAACGTCCGCCCGGGTACTACGAGCATTAGCTTGAAACCCAAAGGACCTGACGGTGCCTTAGACCCCC	Zotu6	4014	MODERATE	100	0.69	107	0	Hypophthalmichthys molitrix	107	1	ACTATGCTCAGCCATAAACCTAGACATCCAACTACAATTAAACGTCCGCCCGGGTACTACGAGCATTAGCTTGAAACCCAAAGGACCTGACGGTGCCTTAGACCCCC
11479674_	Homo sapiens	43	ACTATGCTTAGCCCTAAACCTCAACAGTTAAATCAACAAAACTGCTCGCCAGAACACTACGAGCCACAGCTTAAAACTCAAAGGACCTGGCGGTGCTTCATATCCCT	Zotu8	33	HIGH	100		107	0				ACTATGCTTAGCCCTAAACCTCAACAGTTAAATCAACAAAACTGCTCGCCAGAACACTACGAGCCACAGCTTAAAACTCAAAGGACCTGGCGGTGCTTCATATCCCT
				Zotu13	10	HIGH	100		106	0				ACTATGCTTAGCCCTAAACCTCAACAGTTAAATCAACAAAACTGCTCGCCAGAACACTACGAGCCACAGCTTAAAACTCAAAGGACCTGGCGGTGCTTCATATCCCC
11479674_	Anas platyrhynchos	31	ACTATGCCTGGCCCTAAATCTTGATACTTACCCTACCGAAGTATCCGCCAGAGAACTACGAGCACAAACGCTTAAAACTCTAAGGACTTGGCGGTGCCCTAAACCCAC	Zotu9	31	LOW	100	0	108	0	Anas clypeata	108	0	ACTATGCCTGGCCCTAAATCTTGATACTTACCCTACCGAAGTATCCGCCAGAGAACTACGAGCACAAACGCTTAAAACTCTAAGGACTTGGCGGTGCCCTAAACCCAC
11479674_	Rhodeus amarus	23	ACTATGCTCAGCCATAAACCCAGACATTTTTATACAACACATGTCCGCCAGGGTACTACGAGCATTAGCTTAAAACCCAAAGGACCTGACGGTGCCTCAGACCCCC	Zotu10	23	HIGH	100		106	0				ACTATGCTCAGCCATAAACCCAGACATTTTTATACAACACATGTCCGCCAGGGTACTACGAGCATTAGCTTAAAACCCAAAGGACCTGACGGTGCCTCAGACCCCC
11479674_	Lepomis gibbosus	21	ACTATGCCTAGCCCTAAACATTGGTAACACCCTACATCTGTTGCCCGCCAGGAAACTACGAGCATTAGCTTAAAACCCAAAGGACTTGGCGGTGCTTTAGATCCAC	Zotu11	21	HIGH	99.06		106	1				ACTATGCCTAGCCCTAAACATTGGTAACACCCTACATCTGTTGCCCGCCAGGAAACTACGAGCATTAGCTTAAAACCCAAAGGACTTGGCGGTGCTTTAGATCCAC
11479674_	Columba livia	12	ACTATGCCTGGCCCTAAATCTTGATGCTCTATATAACCAAAGCATCCGCCTGAGAACTACGAGCACAAACGCTTAAAACTCTAAGGACTTGGCGGTGCCCCAAACCCAC	Zotu14	12	HIGH	100		109	0				ACTATGCCTGGCCCTAAATCTTGATGCTCTATATAACCAAAGCATCCGCCTGAGAACTACGAGCACAAACGCTTAAAACTCTAAGGACTTGGCGGTGCCCCAAACCCAC
Sample name	Species	Total read	Representative Sequence	Haploid ID	Size	Confidence	Identity(%)	LOD Score	Align Len	Mismatch	2nd-sp Name	2nd-sp Align Len	2nd-sp Mismatch	Sequence
11479675_	Cyprinus carpio	139898	ACTATGCTCAGCCGTAAACTCAGACATCCAGCTACAATTAGATGTCCGCCAGGGTACTACGAGCATTAGCTTAAAACCCAAAGGACCTGACGGTGTCTCAGACCCCC	Zotu1	139898	HIGH	100		107	0				ACTATGCTCAGCCGTAAACTCAGACATCCAGCTACAATTAGATGTCCGCCAGGGTACTACGAGCATTAGCTTAAAACCCAAAGGACCTGACGGTGTCTCAGACCCCC
11479675_	Homo sapiens	22337	ACTATGCTTAGCCCTAAACCTCAACAGTTAAATCAACAAAACTGCTCGCCAGAACACTACGAGCCACAGCTTAAAACTCAAAGGACCTGGCGGTGCTTCATATCCCT	Zotu2	19517	HIGH	100		107	0				ACTATGCTTAGCCCTAAACCTCAACAGTTAAATCAACAAAACTGCTCGCCAGAACACTACGAGCCACAGCTTAAAACTCAAAGGACCTGGCGGTGCTTCATATCCCT
				Zotu9	2820	HIGH	100		106	0				ACTATGCTTAGCCCTAAACCTCAACAGTTAAATCAACAAAACTGCTCGCCAGAACACTACGAGCCACAGCTTAAAACTCAAAGGACCTGGCGGTGCTTCATATCCCC
11479675_	Anas platyrhynchos	15148	ACTATGCCTGGCCCTAAATCTTGATACTTACCCTACCGAAGTATCCGCCAGAGAACTACGAGCACAAACGCTTAAAACTCTAAGGACTTGGCGGTGCCCTAAACCCAC	Zotu3	15148	LOW	100	0	108	0	Anas clypeata	108	0	ACTATGCCTGGCCCTAAATCTTGATACTTACCCTACCGAAGTATCCGCCAGAGAACTACGAGCACAAACGCTTAAAACTCTAAGGACTTGGCGGTGCCCTAAACCCAC
11479675_	Ctenopharyngodon idella	15138	ACTATGCTCAGCCATAAACCTAGACATCCAACTACAATTAAACGTCCGCCCGGGTACTACGAGCATTAGCTTGAAACCCAAAGGACCTGACGGTGCCTTAGACCCCC	Zotu4	15138	MODERATE	100	0.69	107	0	Hypophthalmichthys molitrix	107	1	ACTATGCTCAGCCATAAACCTAGACATCCAACTACAATTAAACGTCCGCCCGGGTACTACGAGCATTAGCTTGAAACCCAAAGGACCTGACGGTGCCTTAGACCCCC
11479675_	Leuciscus leuciscus	14822	ACTATGCTCGGCCGTAAACCTAGACGTCCAGCTACAATTAGACGTCCGCCCGGGTACTACGAGCATTAGCTTGAAACCCAAAGGACCTGACGGTGCCTTAGACCCCC	Zotu5	14822	MODERATE	100	0.69	107	0	Leuciscus idus	107	1	ACTATGCTCGGCCGTAAACCTAGACGTCCAGCTACAATTAGACGTCCGCCCGGGTACTACGAGCATTAGCTTGAAACCCAAAGGACCTGACGGTGCCTTAGACCCCC
11479675_	Lepomis gibbosus	6843	ACTATGCCTAGCCCTAAACATTGGTAACACCCTACATCTGTTGCCCGCCAGGAAACTACGAGCATTAGCTTAAAACCCAAAGGACTTGGCGGTGCTTTAGATCCAC	Zotu6	6843	HIGH	99.06		106	1				ACTATGCCTAGCCCTAAACATTGGTAACACCCTACATCTGTTGCCCGCCAGGAAACTACGAGCATTAGCTTAAAACCCAAAGGACTTGGCGGTGCTTTAGATCCAC
11479675_	Columba livia	6345	ACTATGCCTGGCCCTAAATCTTGATGCTCTATATAACCAAAGCATCCGCCTGAGAACTACGAGCACAAACGCTTAAAACTCTAAGGACTTGGCGGTGCCCCAAACCCAC	Zotu7	6345	HIGH	100		109	0				ACTATGCCTGGCCCTAAATCTTGATGCTCTATATAACCAAAGCATCCGCCTGAGAACTACGAGCACAAACGCTTAAAACTCTAAGGACTTGGCGGTGCCCCAAACCCAC
11479675_	Rhodeus amarus	7075	ACTATGCTCAGCCATAAACCCAGACATTTTTATACAACACATGTCCGCCAGGGTACTACGAGCATTAGCTTAAAACCCAAAGGACCTGACGGTGCCTCAGACCCCC	Zotu8	6013	HIGH	100		106	0				ACTATGCTCAGCCATAAACCCAGACATTTTTATACAACACATGTCCGCCAGGGTACTACGAGCATTAGCTTAAAACCCAAAGGACCTGACGGTGCCTCAGACCCCC
				Zotu10	1062	HIGH	99.06		106	1				ACTATGCTCAGCCATAAACCCAGACATTTTTATACAACACATGTCCGCCAGGGTACTACGAGCATTAGCTTAAAACCCAAAGGACCTGACGGTGTCTCAGACCCCC
11479675_	Lota lota	976	ACTATGTATGGTTGTTAACATTGATGGTTTTATACTTAAACCATCCGCCTGGGTACTACGAGCATTAGCTTAAAACCCAAAGGACTTGGCGGTGCTTTAGACCCCC	Zotu11	976	HIGH	100		106	0				ACTATGTATGGTTGTTAACATTGATGGTTTTATACTTAAACCATCCGCCTGGGTACTACGAGCATTAGCTTAAAACCCAAAGGACTTGGCGGTGCTTTAGACCCCC
11479675_	Lissotriton vulgaris	74	ACTATGCCTAGTCATAAACTTTGATTTCATCCGCCAGAGTACTACGAGCAACAGCTTAAAACTCAAAGGACTTGGCGGTGCTCTATACCCCC	Zotu13	74	HIGH	100		92	0				ACTATGCCTAGTCATAAACTTTGATTTCATCCGCCAGAGTACTACGAGCAACAGCTTAAAACTCAAAGGACTTGGCGGTGCTCTATACCCCC
11479675_	Rana catesbeiana	53	ACTATGCCTAGCCGTAAACAATTAATTTACACCAATAAGCGCCAGGGAATTACGAGCAATGCTTAAAACCCAAAGGATTTGACGGTGTCCCACCCCA	Zotu15	53	HIGH	100		97	0				ACTATGCCTAGCCGTAAACAATTAATTTACACCAATAAGCGCCAGGGAATTACGAGCAATGCTTAAAACCCAAAGGATTTGACGGTGTCCCACCCCA
11479675_	Barbatula barbatula	10	ACTATGCTCAGCCGTAAACCTAGACGTTATACCACTATAAACGTCCGCCCGGGTACTACGAGCGTTAGCTTAAAACCCAAAGGACTTGGCGGTGCCTTAGACCCCC	Zotu16	10	MODERATE	100	0.69	106	0	Barbatula	106	1	ACTATGCTCAGCCGTAAACCTAGACGTTATACCACTATAAACGTCCGCCCGGGTACTACGAGCGTTAGCTTAAAACCCAAAGGACTTGGCGGTGCCTTAGACCCCC
Sample name	Species	Total read	Representative Sequence	Haploid ID	Size	Confidence	Identity(%)	LOD Score	Align Len	Mismatch	2nd-sp Name	2nd-sp Align Len	2nd-sp Mismatch	Sequence
11479676_	Cyprinus carpio	68294	ACTATGCTCAGCCGTAAACTCAGACATCCAGCTACAATTAGATGTCCGCCAGGGTACTACGAGCATTAGCTTAAAACCCAAAGGACCTGACGGTGTCTCAGACCCCC	Zotu1	68294	HIGH	100		107	0				ACTATGCTCAGCCGTAAACTCAGACATCCAGCTACAATTAGATGTCCGCCAGGGTACTACGAGCATTAGCTTAAAACCCAAAGGACCTGACGGTGTCTCAGACCCCC
11479676_	Leuciscus leuciscus	11036	ACTATGCTCGGCCGTAAACCTAGACGTCCAGCTACAATTAGACGTCCGCCCGGGTACTACGAGCATTAGCTTGAAACCCAAAGGACCTGACGGTGCCTTAGACCCCC	Zotu2	11036	MODERATE	100	0.69	107	0	Leuciscus idus	107	1	ACTATGCTCGGCCGTAAACCTAGACGTCCAGCTACAATTAGACGTCCGCCCGGGTACTACGAGCATTAGCTTGAAACCCAAAGGACCTGACGGTGCCTTAGACCCCC
11479676_	Lepomis gibbosus	6319	ACTATGCCTAGCCCTAAACATTGGTAACACCCTACATCTGTTGCCCGCCAGGAAACTACGAGCATTAGCTTAAAACCCAAAGGACTTGGCGGTGCTTTAGATCCAC	Zotu3	6319	HIGH	99.06		106	1				ACTATGCCTAGCCCTAAACATTGGTAACACCCTACATCTGTTGCCCGCCAGGAAACTACGAGCATTAGCTTAAAACCCAAAGGACTTGGCGGTGCTTTAGATCCAC
11479676_	Leuciscus idus	6084	ACTATGCTCGGCCATAAACCTAGACGTCCAGCTACAATTAGACGTCCGCCCGGGTACTACGAGCATTAGCTTGAAACCCAAAGGACCTGACGGTGCCTTAGACCCCC	Zotu4	6084	MODERATE	100	0.69	107	0	Leuciscus leuciscus	107	1	ACTATGCTCGGCCATAAACCTAGACGTCCAGCTACAATTAGACGTCCGCCCGGGTACTACGAGCATTAGCTTGAAACCCAAAGGACCTGACGGTGCCTTAGACCCCC
11479676_	Anas platyrhynchos	3772	ACTATGCCTGGCCCTAAATCTTGATACTTACCCTACCGAAGTATCCGCCAGAGAACTACGAGCACAAACGCTTAAAACTCTAAGGACTTGGCGGTGCCCTAAACCCAC	Zotu5	3772	LOW	100	0	108	0	Anas clypeata	108	0	ACTATGCCTGGCCCTAAATCTTGATACTTACCCTACCGAAGTATCCGCCAGAGAACTACGAGCACAAACGCTTAAAACTCTAAGGACTTGGCGGTGCCCTAAACCCAC
11479676_	Carassius carassius	3374	ACTATGCTCAGCCGTAAACTTAGACATCCTACTACAATAGATGTCCGCCAGGGTACTACGAGCATTAGCTTAAAACCCAAAGGACCTGACGGTGTCTCAGATCCCC	Zotu6	2657	MODERATE	100	0.69	106	0	Carassius gibelio	106	1	ACTATGCTCAGCCGTAAACTTAGACATCCTACTACAATAGATGTCCGCCAGGGTACTACGAGCATTAGCTTAAAACCCAAAGGACCTGACGGTGTCTCAGATCCCC
				Zotu13	717	LOW	99.06	0.41	106	1	Carassius gibelio	106	2	ACTATGCTCAGCCGTAAACTTAGACATCCTACTACAATAGATGTCCGCCAGGGTACTACGAGCATTAGCTTAAAACCCAAAGGACCTGACGGTGTCTCAGACCCCC
11479676_	Homo sapiens	2143	ACTATGCTTAGCCCTAAACCTCAACAGTTAAATCAACAAAACTGCTCGCCAGAACACTACGAGCCACAGCTTAAAACTCAAAGGACCTGGCGGTGCTTCATATCCCT	Zotu7	1875	HIGH	100		107	0				ACTATGCTTAGCCCTAAACCTCAACAGTTAAATCAACAAAACTGCTCGCCAGAACACTACGAGCCACAGCTTAAAACTCAAAGGACCTGGCGGTGCTTCATATCCCT
				Zotu14	268	HIGH	100		106	0				ACTATGCTTAGCCCTAAACCTCAACAGTTAAATCAACAAAACTGCTCGCCAGAACACTACGAGCCACAGCTTAAAACTCAAAGGACCTGGCGGTGCTTCATATCCCC
11479676_	Barbatula barbatula	1640	ACTATGCTCAGCCGTAAACCTAGACGTTATACCACTATAAACGTCCGCCCGGGTACTACGAGCGTTAGCTTAAAACCCAAAGGACTTGGCGGTGCCTTAGACCCCC	Zotu8	1640	MODERATE	100	0.69	106	0	Barbatula	106	1	ACTATGCTCAGCCGTAAACCTAGACGTTATACCACTATAAACGTCCGCCCGGGTACTACGAGCGTTAGCTTAAAACCCAAAGGACTTGGCGGTGCCTTAGACCCCC
11479676_	Blicca bjoerkna	1433	ACTATGCTCAGCCGTAAACTCAGACATCCAGCTACAATTAGACGTCCGCCCGGGTACTACGAGCATTAGCTTGAAACCCAAAGGACCTGACGGTGCCTTAGACCCCC	Zotu12	1433	LOW	98.13	0.29	107	2	Abramis brama	107	3	ACTATGCTCAGCCGTAAACTCAGACATCCAGCTACAATTAGACGTCCGCCCGGGTACTACGAGCATTAGCTTGAAACCCAAAGGACCTGACGGTGCCTTAGACCCCC
11479676_	Lissotriton vulgaris	1303	ACTATGCCTAGTCATAAACTTTGATTTCATCCGCCAGAGTACTACGAGCAACAGCTTAAAACTCAAAGGACTTGGCGGTGCTCTATACCCCC	Zotu9	1303	HIGH	100		92	0				ACTATGCCTAGTCATAAACTTTGATTTCATCCGCCAGAGTACTACGAGCAACAGCTTAAAACTCAAAGGACTTGGCGGTGCTCTATACCCCC
11479676_	Phoxinus phoxinus	1164	ACTATGCTCAGTCATAAACCTAGACGTCCTACTACAGCTAGACGTCCGCCCGGGTACTACGAGCGCTTGGCTTGAAACCCAAAGGACCTGACGGTGCCTCAGACCCCC	Zotu10	1164	HIGH	100		108	0				ACTATGCTCAGTCATAAACCTAGACGTCCTACTACAGCTAGACGTCCGCCCGGGTACTACGAGCGCTTGGCTTGAAACCCAAAGGACCTGACGGTGCCTCAGACCCCC
11479676_	Ctenopharyngodon idella	955	ACTATGCTCAGCCATAAACCTAGACATCCAACTACAATTAAACGTCCGCCCGGGTACTACGAGCATTAGCTTGAAACCCAAAGGACCTGACGGTGCCTTAGACCCCC	Zotu11	955	MODERATE	100	0.69	107	0	Hypophthalmichthys molitrix	107	1	ACTATGCTCAGCCATAAACCTAGACATCCAACTACAATTAAACGTCCGCCCGGGTACTACGAGCATTAGCTTGAAACCCAAAGGACCTGACGGTGCCTTAGACCCCC
Sample name	Species	Total read	Representative Sequence	Haploid ID	Size	Confidence	Identity(%)	LOD Score	Align Len	Mismatch	2nd-sp Name	2nd-sp Align Len	2nd-sp Mismatch	Sequence
11479677_	Cyprinus carpio	55306	ACTATGCTCAGCCGTAAACTCAGACATCCAGCTACAATTAGATGTCCGCCAGGGTACTACGAGCATTAGCTTAAAACCCAAAGGACCTGACGGTGTCTCAGACCCCC	Zotu1	55306	HIGH	100		107	0				ACTATGCTCAGCCGTAAACTCAGACATCCAGCTACAATTAGATGTCCGCCAGGGTACTACGAGCATTAGCTTAAAACCCAAAGGACCTGACGGTGTCTCAGACCCCC
11479677_	Lepomis gibbosus	9063	ACTATGCCTAGCCCTAAACATTGGTAACACCCTACATCTGTTGCCCGCCAGGAAACTACGAGCATTAGCTTAAAACCCAAAGGACTTGGCGGTGCTTTAGATCCAC	Zotu2	9063	HIGH	99.06		106	1				ACTATGCCTAGCCCTAAACATTGGTAACACCCTACATCTGTTGCCCGCCAGGAAACTACGAGCATTAGCTTAAAACCCAAAGGACTTGGCGGTGCTTTAGATCCAC
11479677_	Lota lota	4139	ACTATGTATGATTGTTAACATTGATGGTTTTATACTTAAACCATCCGCCTGGGTACTACGAGCATTAGCTTAAAACCCAAAGGACTTGGCGGTGCTTTAGACCCCC	Zotu3	3572	HIGH	100		106	0				ACTATGTATGATTGTTAACATTGATGGTTTTATACTTAAACCATCCGCCTGGGTACTACGAGCATTAGCTTAAAACCCAAAGGACTTGGCGGTGCTTTAGACCCCC
				Zotu7	567	HIGH	100		106	0				ACTATGTATGGTTGTTAACATTGATGGTTTTATACTTAAACCATCCGCCTGGGTACTACGAGCATTAGCTTAAAACCCAAAGGACTTGGCGGTGCTTTAGACCCCC
11479677_	Leuciscus leuciscus	2363	ACTATGCTCGGCCGTAAACCTAGACGTCCAGCTACAATTAGACGTCCGCCCGGGTACTACGAGCATTAGCTTGAAACCCAAAGGACCTGACGGTGCCTTAGACCCCC	Zotu5	2363	MODERATE	100	0.69	107	0	Leuciscus idus	107	1	ACTATGCTCGGCCGTAAACCTAGACGTCCAGCTACAATTAGACGTCCGCCCGGGTACTACGAGCATTAGCTTGAAACCCAAAGGACCTGACGGTGCCTTAGACCCCC
11479677_	Fulica atra	1999	ACTATGCTTGGCCCTAAATCTAGATACTTCTTCCCCACTAAAGTATCCGCCTGAGAACTACGAGCACAAACGCTTAAAACTCTAAGGACTTGGCGGTGCTCCAAACCCAC	Zotu4	1999	HIGH	100		110	0				ACTATGCTTGGCCCTAAATCTAGATACTTCTTCCCCACTAAAGTATCCGCCTGAGAACTACGAGCACAAACGCTTAAAACTCTAAGGACTTGGCGGTGCTCCAAACCCAC
11479677_	Ctenopharyngodon idella	1992	ACTATGCTCAGCCATAAACCTAGACATCCAACTACAATTAAACGTCCGCCCGGGTACTACGAGCATTAGCTTGAAACCCAAAGGACCTGACGGTGCCTTAGACCCCC	Zotu6	1808	MODERATE	100	0.69	107	0	Hypophthalmichthys molitrix	107	1	ACTATGCTCAGCCATAAACCTAGACATCCAACTACAATTAAACGTCCGCCCGGGTACTACGAGCATTAGCTTGAAACCCAAAGGACCTGACGGTGCCTTAGACCCCC
				Zotu8	184	LOW	98.13	0.29	107	2	Hypophthalmichthys molitrix	107	3	ACTATGCTCAGCCATAAACCTAGACATCCAACTACAATTAAACGTCCGCCCGGGTACTACGAGCATTAGCTTGAAACCCAAAGGACCTGACGGTGTCTCAGACCCCC
11479677_	Lissotriton helveticus	16	ACTATGCCAGCCATAAACTTTGACCTATCCGCCAGAGTACTACGAGCAACAGCTTAAAACTCAAAGGACTTGGCGGTGCCCTATACCCAC	Zotu9	16	HIGH	100		90	0				ACTATGCCAGCCATAAACTTTGACCTATCCGCCAGAGTACTACGAGCAACAGCTTAAAACTCAAAGGACTTGGCGGTGCCCTATACCCAC
Sample name	Species	Total read	Representative Sequence	Haploid ID	Size	Confidence	Identity(%)	LOD Score	Align Len	Mismatch	2nd-sp Name	2nd-sp Align Len	2nd-sp Mismatch	Sequence
11479678_	Cyprinus carpio	149722	ACTATGCTCAGCCGTAAACTCAGACATCCAGCTACAATTAGATGTCCGCCAGGGTACTACGAGCATTAGCTTAAAACCCAAAGGACCTGACGGTGTCTCAGACCCCC	Zotu1	149722	HIGH	100		107	0				ACTATGCTCAGCCGTAAACTCAGACATCCAGCTACAATTAGATGTCCGCCAGGGTACTACGAGCATTAGCTTAAAACCCAAAGGACCTGACGGTGTCTCAGACCCCC
11479678_	Lepomis gibbosus	30257	ACTATGCCTAGCCCTAAACATTGGTAACACCCTACATCTGTTGCCCGCCAGGAAACTACGAGCATTAGCTTAAAACCCAAAGGACTTGGCGGTGCTTTAGATCCAC	Zotu2	30257	HIGH	99.06		106	1				ACTATGCCTAGCCCTAAACATTGGTAACACCCTACATCTGTTGCCCGCCAGGAAACTACGAGCATTAGCTTAAAACCCAAAGGACTTGGCGGTGCTTTAGATCCAC
11479678_	Leuciscus leuciscus	14369	ACTATGCTCGGCCGTAAACCTAGACGTCCAGCTACAATTAGACGTCCGCCCGGGTACTACGAGCATTAGCTTGAAACCCAAAGGACCTGACGGTGCCTTAGACCCCC	Zotu3	14369	MODERATE	100	0.69	107	0	Leuciscus idus	107	1	ACTATGCTCGGCCGTAAACCTAGACGTCCAGCTACAATTAGACGTCCGCCCGGGTACTACGAGCATTAGCTTGAAACCCAAAGGACCTGACGGTGCCTTAGACCCCC
11479678_	Lissotriton helveticus	10046	ACTATGCCAGCCATAAACTTTGACCTATCCGCCAGAGTACTACGAGCAACAGCTTAAAACTCAAAGGACTTGGCGGTGCCCTATACCCAC	Zotu4	10046	HIGH	100		90	0				ACTATGCCAGCCATAAACTTTGACCTATCCGCCAGAGTACTACGAGCAACAGCTTAAAACTCAAAGGACTTGGCGGTGCCCTATACCCAC
11479678_	Carassius carassius	8169	ACTATGCTCAGCCGTAAACTTAGACATCCTACTACAATAGATGTCCGCCAGGGTACTACGAGCATTAGCTTAAAACCCAAAGGACCTGACGGTGTCTCAGATCCCC	Zotu5	6496	MODERATE	100	0.69	106	0	Carassius gibelio	106	1	ACTATGCTCAGCCGTAAACTTAGACATCCTACTACAATAGATGTCCGCCAGGGTACTACGAGCATTAGCTTAAAACCCAAAGGACCTGACGGTGTCTCAGATCCCC
				Zotu8	1673	LOW	99.06	0.41	106	1	Carassius gibelio	106	2	ACTATGCTCAGCCGTAAACTTAGACATCCTACTACAATAGATGTCCGCCAGGGTACTACGAGCATTAGCTTAAAACCCAAAGGACCTGACGGTGTCTCAGACCCCC
11479678_	Homo sapiens	3961	ACTATGCTTAGCCCTAAACCTCAACAGTTAAATCAACAAAACTGCTCGCCAGAACACTACGAGCCACAGCTTAAAACTCAAAGGACCTGGCGGTGCTTCATATCCCT	Zotu6	3961	HIGH	100		107	0				ACTATGCTTAGCCCTAAACCTCAACAGTTAAATCAACAAAACTGCTCGCCAGAACACTACGAGCCACAGCTTAAAACTCAAAGGACCTGGCGGTGCTTCATATCCCT
11479678_	Phoxinus phoxinus	4947	ACTATGCTCAGTCATAAACCTAGACGTCCTACTACAGCTAGACGTCCGCCCGGGTACTACGAGCGCTTGGCTTGAAACCCAAAGGACCTGACGGTGCCTCAGATCCCC	Zotu7	3417	HIGH	99.07		108	1				ACTATGCTCAGTCATAAACCTAGACGTCCTACTACAGCTAGACGTCCGCCCGGGTACTACGAGCGCTTGGCTTGAAACCCAAAGGACCTGACGGTGCCTCAGATCCCC
				Zotu9	1274	HIGH	100		108	0				ACTATGCTCAGTCATAAACCTAGACGTCCTACTACAGCTAGACGTCCGCCCGGGTACTACGAGCGCTTGGCTTGAAACCCAAAGGACCTGACGGTGCCTCAGACCCCC
				Zotu10	256	HIGH	99.07		108	1				ACTATGCTCAGTCATAAACCTAGACGTCCTACTACAGCTAGACGTCCGCCCGGGTACTACGAGCGCTTGGCTTGAAACCCAAAGGACCTGACGGTGTCTCAGACCCCC
11479678_	Lota lota	53	ACTATGTATGGTTGTTAACATTGATGGTTTTATACTTAAACCATCCGCCTGGGTACTACGAGCATTAGCTTAAAACCCAAAGGACTTGGCGGTGCTTTAGACCCCC	Zotu11	28	HIGH	100		106	0				ACTATGTATGGTTGTTAACATTGATGGTTTTATACTTAAACCATCCGCCTGGGTACTACGAGCATTAGCTTAAAACCCAAAGGACTTGGCGGTGCTTTAGACCCCC
				Zotu12	25	HIGH	100		106	0				ACTATGTATGATTGTTAACATTGATGGTTTTATACTTAAACCATCCGCCTGGGTACTACGAGCATTAGCTTAAAACCCAAAGGACTTGGCGGTGCTTTAGACCCCC
11479678_	Ctenopharyngodon idella	21	ACTATGCTCAGCCATAAACCTAGACATCCAACTACAATTAAACGTCCGCCCGGGTACTACGAGCATTAGCTTGAAACCCAAAGGACCTGACGGTGCCTTAGACCCCC	Zotu13	21	MODERATE	100	0.69	107	0	Hypophthalmichthys molitrix	107	1	ACTATGCTCAGCCATAAACCTAGACATCCAACTACAATTAAACGTCCGCCCGGGTACTACGAGCATTAGCTTGAAACCCAAAGGACCTGACGGTGCCTTAGACCCCC
11479678_	Fulica atra	13	ACTATGCTTGGCCCTAAATCTAGATACTTCTTCCCCACTAAAGTATCCGCCTGAGAACTACGAGCACAAACGCTTAAAACTCTAAGGACTTGGCGGTGCTCCAAACCCAC	Zotu16	13	HIGH	100		110	0				ACTATGCTTGGCCCTAAATCTAGATACTTCTTCCCCACTAAAGTATCCGCCTGAGAACTACGAGCACAAACGCTTAAAACTCTAAGGACTTGGCGGTGCTCCAAACCCAC
Sample name	Species	Total read	Representative Sequence	Haploid ID	Size	Confidence	Identity(%)	LOD Score	Align Len	Mismatch	2nd-sp Name	2nd-sp Align Len	2nd-sp Mismatch	Sequence
11479680_	Cyprinus carpio	58461	ACTATGCTCAGCCGTAAACTCAGACATCCAGCTACAATTAGATGTCCGCCAGGGTACTACGAGCATTAGCTTAAAACCCAAAGGACCTGACGGTGTCTCAGACCCCC	Zotu1	58461	HIGH	100		107	0				ACTATGCTCAGCCGTAAACTCAGACATCCAGCTACAATTAGATGTCCGCCAGGGTACTACGAGCATTAGCTTAAAACCCAAAGGACCTGACGGTGTCTCAGACCCCC
11479680_	Lepomis gibbosus	9978	ACTATGCCTAGCCCTAAACATTGGTAACACCCTACATCTGTTGCCCGCCAGGAAACTACGAGCATTAGCTTAAAACCCAAAGGACTTGGCGGTGCTTTAGATCCAC	Zotu2	9978	HIGH	99.06		106	1				ACTATGCCTAGCCCTAAACATTGGTAACACCCTACATCTGTTGCCCGCCAGGAAACTACGAGCATTAGCTTAAAACCCAAAGGACTTGGCGGTGCTTTAGATCCAC
11479680_	Ctenopharyngodon idella	5439	ACTATGCTCAGCCATAAACCTAGACATCCAACTACAATTAAACGTCCGCCCGGGTACTACGAGCATTAGCTTGAAACCCAAAGGACCTGACGGTGCCTTAGACCCCC	Zotu3	5439	MODERATE	100	0.69	107	0	Hypophthalmichthys molitrix	107	1	ACTATGCTCAGCCATAAACCTAGACATCCAACTACAATTAAACGTCCGCCCGGGTACTACGAGCATTAGCTTGAAACCCAAAGGACCTGACGGTGCCTTAGACCCCC
11479680_	Carassius carassius	4762	ACTATGCTCAGCCGTAAACTTAGACATCCTACTACAATAGATGTCCGCCAGGGTACTACGAGCATTAGCTTAAAACCCAAAGGACCTGACGGTGTCTCAGATCCCC	Zotu4	3746	MODERATE	100	0.69	106	0	Carassius gibelio	106	1	ACTATGCTCAGCCGTAAACTTAGACATCCTACTACAATAGATGTCCGCCAGGGTACTACGAGCATTAGCTTAAAACCCAAAGGACCTGACGGTGTCTCAGATCCCC
				Zotu9	1016	LOW	99.06	0.41	106	1	Carassius gibelio	106	2	ACTATGCTCAGCCGTAAACTTAGACATCCTACTACAATAGATGTCCGCCAGGGTACTACGAGCATTAGCTTAAAACCCAAAGGACCTGACGGTGTCTCAGACCCCC
11479680_	Lota lota	2476	ACTATGTATGATTGTTAACATTGATGGTTTTATACTTAAACCATCCGCCTGGGTACTACGAGCATTAGCTTAAAACCCAAAGGACTTGGCGGTGCTTTAGACCCCC	Zotu5	2476	HIGH	100		106	0				ACTATGTATGATTGTTAACATTGATGGTTTTATACTTAAACCATCCGCCTGGGTACTACGAGCATTAGCTTAAAACCCAAAGGACTTGGCGGTGCTTTAGACCCCC
11479680_	Phoxinus phoxinus	2073	ACTATGCTCAGTCATAAACCTAGACGTCCTACTACAGCTAGACGTCCGCCCGGGTACTACGAGCGCTTGGCTTGAAACCCAAAGGACCTGACGGTGCCTCAGACCCCC	Zotu7	2073	HIGH	100		108	0				ACTATGCTCAGTCATAAACCTAGACGTCCTACTACAGCTAGACGTCCGCCCGGGTACTACGAGCGCTTGGCTTGAAACCCAAAGGACCTGACGGTGCCTCAGACCCCC
11479680_	Lissotriton vulgaris	2061	ACTATGCCTAGTCATAAACTTTGATTTCATCCGCCAGAGTACTACGAGCAACAGCTTAAAACTCAAAGGACTTGGCGGTGCTCTATACCCCC	Zotu6	2061	HIGH	100		92	0				ACTATGCCTAGTCATAAACTTTGATTTCATCCGCCAGAGTACTACGAGCAACAGCTTAAAACTCAAAGGACTTGGCGGTGCTCTATACCCCC
11479680_	Leuciscus leuciscus	1602	ACTATGCTCGGCCGTAAACCTAGACGTCCAGCTACAATTAGACGTCCGCCCGGGTACTACGAGCATTAGCTTGAAACCCAAAGGACCTGACGGTGCCTTAGACCCCC	Zotu8	1602	MODERATE	100	0.69	107	0	Leuciscus idus	107	1	ACTATGCTCGGCCGTAAACCTAGACGTCCAGCTACAATTAGACGTCCGCCCGGGTACTACGAGCATTAGCTTGAAACCCAAAGGACCTGACGGTGCCTTAGACCCCC
Sample name	Species	Total read	Representative Sequence	Haploid ID	Size	Confidence	Identity(%)	LOD Score	Align Len	Mismatch	2nd-sp Name	2nd-sp Align Len	2nd-sp Mismatch	Sequence
11479681_	Cyprinus carpio	37470	ACTATGCTCAGCCGTAAACTCAGACATCCAGCTACAATTAGATGTCCGCCAGGGTACTACGAGCATTAGCTTAAAACCCAAAGGACCTGACGGTGTCTCAGACCCCC	Zotu1	37470	HIGH	100		107	0				ACTATGCTCAGCCGTAAACTCAGACATCCAGCTACAATTAGATGTCCGCCAGGGTACTACGAGCATTAGCTTAAAACCCAAAGGACCTGACGGTGTCTCAGACCCCC
11479681_	Phoxinus phoxinus	2595	ACTATGCTCAGTCATAAACCTAGACGTCCTACTACAGCTAGACGTCCGCCCGGGTACTACGAGCGCTTGGCTTGAAACCCAAAGGACCTGACGGTGCCTCAGACCCCC	Zotu2	2595	HIGH	100		108	0				ACTATGCTCAGTCATAAACCTAGACGTCCTACTACAGCTAGACGTCCGCCCGGGTACTACGAGCGCTTGGCTTGAAACCCAAAGGACCTGACGGTGCCTCAGACCCCC
11479681_	Leuciscus leuciscus	1796	ACTATGCTCGGCCGTAAACCTAGACGTCCAGCTACAATTAGACGTCCGCCCGGGTACTACGAGCATTAGCTTGAAACCCAAAGGACCTGACGGTGCCTTAGACCCCC	Zotu3	1439	MODERATE	100	0.69	107	0	Leuciscus idus	107	1	ACTATGCTCGGCCGTAAACCTAGACGTCCAGCTACAATTAGACGTCCGCCCGGGTACTACGAGCATTAGCTTGAAACCCAAAGGACCTGACGGTGCCTTAGACCCCC
				Zotu15	226	LOW	97.2		107	3				ACTATGCTCGGCCGTAAACCTAGACGTCCAGCTACAATTAGACGTCCGCCCGGGTACTACGAGCATTAGCTTAAAACCCAAAGGACCTGACGGTGTCTCAGACCCCC
				Zotu17	131	LOW	98.13	0.29	107	2	Leuciscus idus	107	3	ACTATGCTCGGCCGTAAACCTAGACGTCCAGCTACAATTAGACGTCCGCCCGGGTACTACGAGCATTAGCTTGAAACCCAAAGGACCTGACGGTGTCTCAGACCCCC
11479681_	Lepomis gibbosus	943	ACTATGCCTAGCCCTAAACATTGGTAACACCCTACATCTGTTGCCCGCCAGGAAACTACGAGCATTAGCTTAAAACCCAAAGGACTTGGCGGTGCTTTAGATCCAC	Zotu5	943	HIGH	99.06		106	1				ACTATGCCTAGCCCTAAACATTGGTAACACCCTACATCTGTTGCCCGCCAGGAAACTACGAGCATTAGCTTAAAACCCAAAGGACTTGGCGGTGCTTTAGATCCAC
11479681_	Lota lota	927	ACTATGTATGGTTGTTAACATTGATGGTTTTATACTTAAACCATCCGCCTGGGTACTACGAGCATTAGCTTAAAACCCAAAGGACTTGGCGGTGCTTTAGACCCCC	Zotu4	927	HIGH	100		106	0				ACTATGTATGGTTGTTAACATTGATGGTTTTATACTTAAACCATCCGCCTGGGTACTACGAGCATTAGCTTAAAACCCAAAGGACTTGGCGGTGCTTTAGACCCCC
11479681_	Rhodeus amarus	1135	ACTATGCTCAGCCATAAACCCAGACATTTTTATACAACACATGTCCGCCAGGGTACTACGAGCATTAGCTTAAAACCCAAAGGACCTGACGGTGCCTCAGACCCCC	Zotu6	839	HIGH	100		106	0				ACTATGCTCAGCCATAAACCCAGACATTTTTATACAACACATGTCCGCCAGGGTACTACGAGCATTAGCTTAAAACCCAAAGGACCTGACGGTGCCTCAGACCCCC
				Zotu12	296	HIGH	99.06		106	1				ACTATGCTCAGCCATAAACCCAGACATTTTTATACAACACATGTCCGCCAGGGTACTACGAGCATTAGCTTAAAACCCAAAGGACCTGACGGTGTCTCAGACCCCC
11479681_	Homo sapiens	597	ACTATGCTTAGCCCTAAACCTCAACAGTTAAATCAACAAAACTGCTCGCCAGAACACTACGAGCCACAGCTTAAAACTCAAAGGACCTGGCGGTGCTTCATATCCCT	Zotu9	597	HIGH	100		107	0				ACTATGCTTAGCCCTAAACCTCAACAGTTAAATCAACAAAACTGCTCGCCAGAACACTACGAGCCACAGCTTAAAACTCAAAGGACCTGGCGGTGCTTCATATCCCT
11479681_	Anas platyrhynchos	596	ACTATGCCTGGCCCTAAATCTTGATACTTACCCTACCGAAGTATCCGCCAGAGAACTACGAGCACAAACGCTTAAAACTCTAAGGACTTGGCGGTGCCCTAAACCCAC	Zotu8	596	LOW	100	0	108	0	Anas clypeata	108	0	ACTATGCCTGGCCCTAAATCTTGATACTTACCCTACCGAAGTATCCGCCAGAGAACTACGAGCACAAACGCTTAAAACTCTAAGGACTTGGCGGTGCCCTAAACCCAC
11479681_	Lissotriton vulgaris	589	ACTATGCCTAGTCATAAACTTTGATTTCATCCGCCAGAGTACTACGAGCAACAGCTTAAAACTCAAAGGACTTGGCGGTGCTCTATACCCCC	Zotu7	589	HIGH	100		92	0				ACTATGCCTAGTCATAAACTTTGATTTCATCCGCCAGAGTACTACGAGCAACAGCTTAAAACTCAAAGGACTTGGCGGTGCTCTATACCCCC
11479681_	Ctenopharyngodon idella	621	ACTATGCTCAGCCATAAACCTAGACATCCAACTACAATTAAACGTCCGCCCGGGTACTACGAGCATTAGCTTGAAACCCAAAGGACCTGACGGTGCCTTAGACCCCC	Zotu10	490	MODERATE	100	0.69	107	0	Hypophthalmichthys molitrix	107	1	ACTATGCTCAGCCATAAACCTAGACATCCAACTACAATTAAACGTCCGCCCGGGTACTACGAGCATTAGCTTGAAACCCAAAGGACCTGACGGTGCCTTAGACCCCC
				Zotu21	79	LOW	97.2		107	3				ACTATGCTCAGCCATAAACCTAGACATCCAACTACAATTAAACGTCCGCCCGGGTACTACGAGCATTAGCTTAAAACCCAAAGGACCTGACGGTGTCTCAGACCCCC
				Zotu22	52	LOW	98.13	0.29	107	2	Hypophthalmichthys molitrix	107	3	ACTATGCTCAGCCATAAACCTAGACATCCAACTACAATTAAACGTCCGCCCGGGTACTACGAGCATTAGCTTGAAACCCAAAGGACCTGACGGTGTCTCAGACCCCC
11479681_	Blicca bjoerkna	464	ACTATGCTCAGCCGTAAACTCAGACATCCAGCTACAATTAGACGTCCGCCCGGGTACTACGAGCATTAGCTTGAAACCCAAAGGACCTGACGGTGCCTTAGACCCCC	Zotu14	464	LOW	98.13	0.29	107	2	Abramis brama	107	3	ACTATGCTCAGCCGTAAACTCAGACATCCAGCTACAATTAGACGTCCGCCCGGGTACTACGAGCATTAGCTTGAAACCCAAAGGACCTGACGGTGCCTTAGACCCCC
11479681_	Carassius carassius	667	ACTATGCTCAGCCGTAAACTTAGACATCCTACTACAATAGATGTCCGCCAGGGTACTACGAGCATTAGCTTAAAACCCAAAGGACCTGACGGTGTCTCAGATCCCC	Zotu11	415	MODERATE	100	0.69	106	0	Carassius gibelio	106	1	ACTATGCTCAGCCGTAAACTTAGACATCCTACTACAATAGATGTCCGCCAGGGTACTACGAGCATTAGCTTAAAACCCAAAGGACCTGACGGTGTCTCAGATCCCC
				Zotu13	252	LOW	99.06	0.41	106	1	Carassius gibelio	106	2	ACTATGCTCAGCCGTAAACTTAGACATCCTACTACAATAGATGTCCGCCAGGGTACTACGAGCATTAGCTTAAAACCCAAAGGACCTGACGGTGTCTCAGACCCCC
Sample name	Species	Total read	Representative Sequence	Haploid ID	Size	Confidence	Identity(%)	LOD Score	Align Len	Mismatch	2nd-sp Name	2nd-sp Align Len	2nd-sp Mismatch	Sequence
11479682_	Cyprinus carpio	95831	ACTATGCTCAGCCGTAAACTCAGACATCCAGCTACAATTAGATGTCCGCCAGGGTACTACGAGCATTAGCTTAAAACCCAAAGGACCTGACGGTGTCTCAGACCCCC	Zotu1	95831	HIGH	100		107	0				ACTATGCTCAGCCGTAAACTCAGACATCCAGCTACAATTAGATGTCCGCCAGGGTACTACGAGCATTAGCTTAAAACCCAAAGGACCTGACGGTGTCTCAGACCCCC
11479682_	Lepomis gibbosus	7264	ACTATGCCTAGCCCTAAACATTGGTAACACCCTACATCTGTTGCCCGCCAGGAAACTACGAGCATTAGCTTAAAACCCAAAGGACTTGGCGGTGCTTTAGATCCAC	Zotu2	7264	HIGH	99.06		106	1				ACTATGCCTAGCCCTAAACATTGGTAACACCCTACATCTGTTGCCCGCCAGGAAACTACGAGCATTAGCTTAAAACCCAAAGGACTTGGCGGTGCTTTAGATCCAC
11479682_	Triturus cristatus	5938	ACTATGCCTAGCTATAAACTTTGACCCATATCCGCCAGAGTACTACGAGCAACAGCTTAAAACTCAAAGGACTTGGCGGTGCTCTACACCCAC	Zotu3	5938	HIGH	100		93	0				ACTATGCCTAGCTATAAACTTTGACCCATATCCGCCAGAGTACTACGAGCAACAGCTTAAAACTCAAAGGACTTGGCGGTGCTCTACACCCAC
11479682_	Phoxinus phoxinus	5800	ACTATGCTCAGTCATAAACCTAGACGTCCTACTACAGCTAGACGTCCGCCCGGGTACTACGAGCGCTTGGCTTGAAACCCAAAGGACCTGACGGTGCCTCAGACCCCC	Zotu4	5800	HIGH	100		108	0				ACTATGCTCAGTCATAAACCTAGACGTCCTACTACAGCTAGACGTCCGCCCGGGTACTACGAGCGCTTGGCTTGAAACCCAAAGGACCTGACGGTGCCTCAGACCCCC
11479682_	Leuciscus leuciscus	2924	ACTATGCTCGGCCGTAAACCTAGACGTCCAGCTACAATTAGACGTCCGCCCGGGTACTACGAGCATTAGCTTGAAACCCAAAGGACCTGACGGTGCCTTAGACCCCC	Zotu5	2479	MODERATE	100	0.69	107	0	Leuciscus idus	107	1	ACTATGCTCGGCCGTAAACCTAGACGTCCAGCTACAATTAGACGTCCGCCCGGGTACTACGAGCATTAGCTTGAAACCCAAAGGACCTGACGGTGCCTTAGACCCCC
				Zotu11	249	LOW	97.2		107	3				ACTATGCTCGGCCGTAAACCTAGACGTCCAGCTACAATTAGACGTCCGCCCGGGTACTACGAGCATTAGCTTAAAACCCAAAGGACCTGACGGTGTCTCAGACCCCC
				Zotu12	196	LOW	98.13	0.29	107	2	Leuciscus idus	107	3	ACTATGCTCGGCCGTAAACCTAGACGTCCAGCTACAATTAGACGTCCGCCCGGGTACTACGAGCATTAGCTTGAAACCCAAAGGACCTGACGGTGTCTCAGACCCCC
11479682_	Homo sapiens	2364	ACTATGCTTAGCCCTAAACCTCAACAGTTAAATCAACAAAACTGCTCGCCAGAACACTACGAGCCACAGCTTAAAACTCAAAGGACCTGGCGGTGCTTCATATCCCT	Zotu6	2364	HIGH	100		107	0				ACTATGCTTAGCCCTAAACCTCAACAGTTAAATCAACAAAACTGCTCGCCAGAACACTACGAGCCACAGCTTAAAACTCAAAGGACCTGGCGGTGCTTCATATCCCT
11479682_	Ctenopharyngodon idella	2347	ACTATGCTCAGCCATAAACCTAGACATCCAACTACAATTAAACGTCCGCCCGGGTACTACGAGCATTAGCTTGAAACCCAAAGGACCTGACGGTGCCTTAGACCCCC	Zotu7	2060	MODERATE	100	0.69	107	0	Hypophthalmichthys molitrix	107	1	ACTATGCTCAGCCATAAACCTAGACATCCAACTACAATTAAACGTCCGCCCGGGTACTACGAGCATTAGCTTGAAACCCAAAGGACCTGACGGTGCCTTAGACCCCC
				Zotu13	287	LOW	98.13	0.29	107	2	Hypophthalmichthys molitrix	107	3	ACTATGCTCAGCCATAAACCTAGACATCCAACTACAATTAAACGTCCGCCCGGGTACTACGAGCATTAGCTTGAAACCCAAAGGACCTGACGGTGTCTCAGACCCCC
11479682_	Blicca bjoerkna	1098	ACTATGCTCAGCCGTAAACTCAGACATCCAGCTACAATTAGACGTCCGCCCGGGTACTACGAGCATTAGCTTGAAACCCAAAGGACCTGACGGTGCCTTAGACCCCC	Zotu9	1098	LOW	98.13	0.29	107	2	Abramis brama	107	3	ACTATGCTCAGCCGTAAACTCAGACATCCAGCTACAATTAGACGTCCGCCCGGGTACTACGAGCATTAGCTTGAAACCCAAAGGACCTGACGGTGCCTTAGACCCCC
11479682_	Leuciscus idus	1224	ACTATGCTCGGCCATAAACCTAGACGTCCAGCTACAATTAGACGTCCGCCCGGGTACTACGAGCATTAGCTTGAAACCCAAAGGACCTGACGGTGCCTTAGACCCCC	Zotu8	1023	MODERATE	100	0.69	107	0	Leuciscus leuciscus	107	1	ACTATGCTCGGCCATAAACCTAGACGTCCAGCTACAATTAGACGTCCGCCCGGGTACTACGAGCATTAGCTTGAAACCCAAAGGACCTGACGGTGCCTTAGACCCCC
				Zotu14	130	LOW	97.2		107	3				ACTATGCTCGGCCATAAACCTAGACGTCCAGCTACAATTAGACGTCCGCCCGGGTACTACGAGCATTAGCTTAAAACCCAAAGGACCTGACGGTGTCTCAGACCCCC
				Zotu16	71	LOW	98.13	0.29	107	2	Leuciscus leuciscus	107	3	ACTATGCTCGGCCATAAACCTAGACGTCCAGCTACAATTAGACGTCCGCCCGGGTACTACGAGCATTAGCTTGAAACCCAAAGGACCTGACGGTGTCTCAGACCCCC
Sample name	Species	Total read	Representative Sequence	Haploid ID	Size	Confidence	Identity(%)	LOD Score	Align Len	Mismatch	2nd-sp Name	2nd-sp Align Len	2nd-sp Mismatch	Sequence
11479683_	Cyprinus carpio	34982	ACTATGCTCAGCCGTAAACTCAGACATCCAGCTACAATTAGATGTCCGCCAGGGTACTACGAGCATTAGCTTAAAACCCAAAGGACCTGACGGTGTCTCAGACCCCC	Zotu1	34070	HIGH	100		107	0				ACTATGCTCAGCCGTAAACTCAGACATCCAGCTACAATTAGATGTCCGCCAGGGTACTACGAGCATTAGCTTAAAACCCAAAGGACCTGACGGTGTCTCAGACCCCC
				Zotu10	912	LOW	97.2		107	3				ACTATGCTCAGCCGTAAACTCAGACATCCAGCTACAATTAGATGTCCGCCAGGGTACTACGAGCATTAGCTTGAAACCCAAAGGACCTGACGGTGCCTTAGACCCCC
11479683_	Lepomis gibbosus	5582	ACTATGCCTAGCCCTAAACATTGGTAACACCCTACATCTGTTGCCCGCCAGGAAACTACGAGCATTAGCTTAAAACCCAAAGGACTTGGCGGTGCTTTAGATCCAC	Zotu2	5582	HIGH	99.06		106	1				ACTATGCCTAGCCCTAAACATTGGTAACACCCTACATCTGTTGCCCGCCAGGAAACTACGAGCATTAGCTTAAAACCCAAAGGACTTGGCGGTGCTTTAGATCCAC
11479683_	Leuciscus leuciscus	3368	ACTATGCTCGGCCGTAAACCTAGACGTCCAGCTACAATTAGACGTCCGCCCGGGTACTACGAGCATTAGCTTGAAACCCAAAGGACCTGACGGTGCCTTAGACCCCC	Zotu3	2860	MODERATE	100	0.69	107	0	Leuciscus idus	107	1	ACTATGCTCGGCCGTAAACCTAGACGTCCAGCTACAATTAGACGTCCGCCCGGGTACTACGAGCATTAGCTTGAAACCCAAAGGACCTGACGGTGCCTTAGACCCCC
				Zotu11	294	LOW	97.2		107	3				ACTATGCTCGGCCGTAAACCTAGACGTCCAGCTACAATTAGACGTCCGCCCGGGTACTACGAGCATTAGCTTAAAACCCAAAGGACCTGACGGTGTCTCAGACCCCC
				Zotu13	214	LOW	98.13	0.29	107	2	Leuciscus idus	107	3	ACTATGCTCGGCCGTAAACCTAGACGTCCAGCTACAATTAGACGTCCGCCCGGGTACTACGAGCATTAGCTTGAAACCCAAAGGACCTGACGGTGTCTCAGACCCCC
11479683_	Leuciscus idus	2681	ACTATGCTCGGCCATAAACCTAGACGTCCAGCTACAATTAGACGTCCGCCCGGGTACTACGAGCATTAGCTTGAAACCCAAAGGACCTGACGGTGCCTTAGACCCCC	Zotu4	2317	MODERATE	100	0.69	107	0	Leuciscus leuciscus	107	1	ACTATGCTCGGCCATAAACCTAGACGTCCAGCTACAATTAGACGTCCGCCCGGGTACTACGAGCATTAGCTTGAAACCCAAAGGACCTGACGGTGCCTTAGACCCCC
				Zotu14	204	LOW	97.2		107	3				ACTATGCTCGGCCATAAACCTAGACGTCCAGCTACAATTAGACGTCCGCCCGGGTACTACGAGCATTAGCTTAAAACCCAAAGGACCTGACGGTGTCTCAGACCCCC
				Zotu15	160	LOW	98.13	0.29	107	2	Leuciscus leuciscus	107	3	ACTATGCTCGGCCATAAACCTAGACGTCCAGCTACAATTAGACGTCCGCCCGGGTACTACGAGCATTAGCTTGAAACCCAAAGGACCTGACGGTGTCTCAGACCCCC
11479683_	Phoxinus phoxinus	887	ACTATGCTCAGTCATAAACCTAGACGTCCTACTACAGCTAGACGTCCGCCCGGGTACTACGAGCGCTTGGCTTGAAACCCAAAGGACCTGACGGTGCCTCAGACCCCC	Zotu7	887	HIGH	100		108	0				ACTATGCTCAGTCATAAACCTAGACGTCCTACTACAGCTAGACGTCCGCCCGGGTACTACGAGCGCTTGGCTTGAAACCCAAAGGACCTGACGGTGCCTCAGACCCCC
11479683_	Ctenopharyngodon idella	945	ACTATGCTCAGCCATAAACCTAGACATCCAACTACAATTAAACGTCCGCCCGGGTACTACGAGCATTAGCTTGAAACCCAAAGGACCTGACGGTGCCTTAGACCCCC	Zotu6	837	MODERATE	100	0.69	107	0	Hypophthalmichthys molitrix	107	1	ACTATGCTCAGCCATAAACCTAGACATCCAACTACAATTAAACGTCCGCCCGGGTACTACGAGCATTAGCTTGAAACCCAAAGGACCTGACGGTGCCTTAGACCCCC
				Zotu18	108	LOW	98.13	0.29	107	2	Hypophthalmichthys molitrix	107	3	ACTATGCTCAGCCATAAACCTAGACATCCAACTACAATTAAACGTCCGCCCGGGTACTACGAGCATTAGCTTGAAACCCAAAGGACCTGACGGTGTCTCAGACCCCC
11479683_	Anas platyrhynchos	937	ACTATGCCTGGCCCTAAATCTTGATACTTACCCTACCGAAGTATCCGCCAGAGAACTACGAGCACAAACGCTTAAAACTCTAAGGACTTGGCGGTGCCCTAAACCCAC	Zotu5	831	LOW	100	0	108	0	Anas clypeata	108	0	ACTATGCCTGGCCCTAAATCTTGATACTTACCCTACCGAAGTATCCGCCAGAGAACTACGAGCACAAACGCTTAAAACTCTAAGGACTTGGCGGTGCCCTAAACCCAC
				Zotu17	106	LOW	99.07	0	108	1	Anas clypeata	108	1	ACTATGCCTGGCCGTAAATCTTGATACTTACCCTACCGAAGTATCCGCCAGAGAACTACGAGCACAAACGCTTAAAACTCTAAGGACTTGGCGGTGCCCTAAACCCAC
11479683_	Homo sapiens	771	ACTATGCTTAGCCCTAAACCTCAACAGTTAAATCAACAAAACTGCTCGCCAGAACACTACGAGCCACAGCTTAAAACTCAAAGGACCTGGCGGTGCTTCATATCCCT	Zotu8	771	HIGH	100		107	0				ACTATGCTTAGCCCTAAACCTCAACAGTTAAATCAACAAAACTGCTCGCCAGAACACTACGAGCCACAGCTTAAAACTCAAAGGACCTGGCGGTGCTTCATATCCCT
11479683_	Blicca bjoerkna	597	ACTATGCTCAGCCGTAAACTCAGACATCCAGCTACAATTAGACGTCCGCCCGGGTACTACGAGCATTAGCTTGAAACCCAAAGGACCTGACGGTGCCTTAGACCCCC	Zotu9	597	LOW	98.13	0.29	107	2	Abramis brama	107	3	ACTATGCTCAGCCGTAAACTCAGACATCCAGCTACAATTAGACGTCCGCCCGGGTACTACGAGCATTAGCTTGAAACCCAAAGGACCTGACGGTGCCTTAGACCCCC
Sample name	Species	Total read	Representative Sequence	Haploid ID	Size	Confidence	Identity(%)	LOD Score	Align Len	Mismatch	2nd-sp Name	2nd-sp Align Len	2nd-sp Mismatch	Sequence
11479769_	Cyprinus carpio	72669	ACTATGCTCAGCCGTAAACTCAGACATCCAGCTACAATTAGATGTCCGCCAGGGTACTACGAGCATTAGCTTAAAACCCAAAGGACCTGACGGTGTCTCAGACCCCC	Zotu1	72669	HIGH	100		107	0				ACTATGCTCAGCCGTAAACTCAGACATCCAGCTACAATTAGATGTCCGCCAGGGTACTACGAGCATTAGCTTAAAACCCAAAGGACCTGACGGTGTCTCAGACCCCC
11479769_	Homo sapiens	8667	ACTATGCTTAGCCCTAAACCTCAACAGTTAAATCAACAAAACTGCTCGCCAGAACACTACGAGCCACAGCTTAAAACTCAAAGGACCTGGCGGTGCTTCATATCCCT	Zotu2	8667	HIGH	100		107	0				ACTATGCTTAGCCCTAAACCTCAACAGTTAAATCAACAAAACTGCTCGCCAGAACACTACGAGCCACAGCTTAAAACTCAAAGGACCTGGCGGTGCTTCATATCCCT
11479769_	Leuciscus leuciscus	7236	ACTATGCTCGGCCGTAAACCTAGACGTCCAGCTACAATTAGACGTCCGCCCGGGTACTACGAGCATTAGCTTGAAACCCAAAGGACCTGACGGTGCCTTAGACCCCC	Zotu3	6219	MODERATE	100	0.69	107	0	Leuciscus idus	107	1	ACTATGCTCGGCCGTAAACCTAGACGTCCAGCTACAATTAGACGTCCGCCCGGGTACTACGAGCATTAGCTTGAAACCCAAAGGACCTGACGGTGCCTTAGACCCCC
				Zotu8	525	LOW	97.2		107	3				ACTATGCTCGGCCGTAAACCTAGACGTCCAGCTACAATTAGACGTCCGCCCGGGTACTACGAGCATTAGCTTAAAACCCAAAGGACCTGACGGTGTCTCAGACCCCC
				Zotu6	492	LOW	98.13	0.29	107	2	Leuciscus idus	107	3	ACTATGCTCGGCCGTAAACCTAGACGTCCAGCTACAATTAGACGTCCGCCCGGGTACTACGAGCATTAGCTTGAAACCCAAAGGACCTGACGGTGTCTCAGACCCCC
11479769_	Lepomis gibbosus	4399	ACTATGCCTAGCCCTAAACATTGGTAACACCCTACATCTGTTGCCCGCCAGGAAACTACGAGCATTAGCTTAAAACCCAAAGGACTTGGCGGTGCTTTAGATCCAC	Zotu4	4399	HIGH	99.06		106	1				ACTATGCCTAGCCCTAAACATTGGTAACACCCTACATCTGTTGCCCGCCAGGAAACTACGAGCATTAGCTTAAAACCCAAAGGACTTGGCGGTGCTTTAGATCCAC
11479769_	Phoxinus phoxinus	3521	ACTATGCTCAGTCATAAACCTAGACGTCCTACTACAGCTAGACGTCCGCCCGGGTACTACGAGCGCTTGGCTTGAAACCCAAAGGACCTGACGGTGCCTCAGATCCCC	Zotu5	3202	HIGH	99.07		108	1				ACTATGCTCAGTCATAAACCTAGACGTCCTACTACAGCTAGACGTCCGCCCGGGTACTACGAGCGCTTGGCTTGAAACCCAAAGGACCTGACGGTGCCTCAGATCCCC
				Zotu11	319	HIGH	99.07		108	1				ACTATGCTCAGTCATAAACCTAGACGTCCTACTACAGCTAGACGTCCGCCCGGGTACTACGAGCGCTTGGCTTGAAACCCAAAGGACCTGACGGTGTCTCAGACCCCC
11479769_	Blicca bjoerkna	910	ACTATGCTCAGCCGTAAACTCAGACATCCAGCTACAATTAGACGTCCGCCCGGGTACTACGAGCATTAGCTTGAAACCCAAAGGACCTGACGGTGCCTTAGACCCCC	Zotu7	910	LOW	98.13	0.29	107	2	Abramis brama	107	3	ACTATGCTCAGCCGTAAACTCAGACATCCAGCTACAATTAGACGTCCGCCCGGGTACTACGAGCATTAGCTTGAAACCCAAAGGACCTGACGGTGCCTTAGACCCCC
11479769_	Lissotriton vulgaris	12	ACTATGCCTAGTCATAAACTTTGATTTCATCCGCCAGAGTACTACGAGCAACAGCTTAAAACTCAAAGGACTTGGCGGTGCTCTATACCCCC	Zotu12	12	HIGH	100		92	0				ACTATGCCTAGTCATAAACTTTGATTTCATCCGCCAGAGTACTACGAGCAACAGCTTAAAACTCAAAGGACTTGGCGGTGCTCTATACCCCC
Sample name	Species	Total read	Representative Sequence	Haploid ID	Size	Confidence	Identity(%)	LOD Score	Align Len	Mismatch	2nd-sp Name	2nd-sp Align Len	2nd-sp Mismatch	Sequence
11479770_	Cyprinus carpio	104015	ACTATGCTCAGCCGTAAACTCAGACATCCAGCTACAATTAGATGTCCGCCAGGGTACTACGAGCATTAGCTTAAAACCCAAAGGACCTGACGGTGTCTCAGACCCCC	Zotu1	104015	HIGH	100		107	0				ACTATGCTCAGCCGTAAACTCAGACATCCAGCTACAATTAGATGTCCGCCAGGGTACTACGAGCATTAGCTTAAAACCCAAAGGACCTGACGGTGTCTCAGACCCCC
11479770_	Homo sapiens	24032	ACTATGCTTAGCCCTAAACCTCAACAGTTAAATCAACAAAACTGCTCGCCAGAACACTACGAGCCACAGCTTAAAACTCAAAGGACCTGGCGGTGCTTCATATCCCT	Zotu2	24032	HIGH	100		107	0				ACTATGCTTAGCCCTAAACCTCAACAGTTAAATCAACAAAACTGCTCGCCAGAACACTACGAGCCACAGCTTAAAACTCAAAGGACCTGGCGGTGCTTCATATCCCT
11479770_	Leuciscus leuciscus	19749	ACTATGCTCGGCCGTAAACCTAGACGTCCAGCTACAATTAGACGTCCGCCCGGGTACTACGAGCATTAGCTTGAAACCCAAAGGACCTGACGGTGCCTTAGACCCCC	Zotu3	19749	MODERATE	100	0.69	107	0	Leuciscus idus	107	1	ACTATGCTCGGCCGTAAACCTAGACGTCCAGCTACAATTAGACGTCCGCCCGGGTACTACGAGCATTAGCTTGAAACCCAAAGGACCTGACGGTGCCTTAGACCCCC
11479770_	Lepomis gibbosus	16521	ACTATGCCTAGCCCTAAACATTGGTAACACCCTACATCTGTTGCCCGCCAGGAAACTACGAGCATTAGCTTAAAACCCAAAGGACTTGGCGGTGCTTTAGATCCAC	Zotu4	16521	HIGH	99.06		106	1				ACTATGCCTAGCCCTAAACATTGGTAACACCCTACATCTGTTGCCCGCCAGGAAACTACGAGCATTAGCTTAAAACCCAAAGGACTTGGCGGTGCTTTAGATCCAC
11479770_	Leuciscus idus	8236	ACTATGCTCGGCCATAAACCTAGACGTCCAGCTACAATTAGACGTCCGCCCGGGTACTACGAGCATTAGCTTGAAACCCAAAGGACCTGACGGTGCCTTAGACCCCC	Zotu5	8236	MODERATE	100	0.69	107	0	Leuciscus leuciscus	107	1	ACTATGCTCGGCCATAAACCTAGACGTCCAGCTACAATTAGACGTCCGCCCGGGTACTACGAGCATTAGCTTGAAACCCAAAGGACCTGACGGTGCCTTAGACCCCC
11479770_	Lissotriton vulgaris	5258	ACTATGCCTAGTCATAAACTTTGATTTCATCCGCCAGAGTACTACGAGCAACAGCTTAAAACTCAAAGGACTTGGCGGTGCTCTATACCCCC	Zotu6	5258	HIGH	100		92	0				ACTATGCCTAGTCATAAACTTTGATTTCATCCGCCAGAGTACTACGAGCAACAGCTTAAAACTCAAAGGACTTGGCGGTGCTCTATACCCCC
11479770_	Ctenopharyngodon idella	4882	ACTATGCTCAGCCATAAACCTAGACATCCAACTACAATTAAACGTCCGCCCGGGTACTACGAGCATTAGCTTGAAACCCAAAGGACCTGACGGTGCCTTAGACCCCC	Zotu7	4882	MODERATE	100	0.69	107	0	Hypophthalmichthys molitrix	107	1	ACTATGCTCAGCCATAAACCTAGACATCCAACTACAATTAAACGTCCGCCCGGGTACTACGAGCATTAGCTTGAAACCCAAAGGACCTGACGGTGCCTTAGACCCCC
11479770_	Carassius carassius	5462	ACTATGCTCAGCCGTAAACTTAGACATCCTACTACAATAGATGTCCGCCAGGGTACTACGAGCATTAGCTTAAAACCCAAAGGACCTGACGGTGTCTCAGATCCCC	Zotu8	3970	MODERATE	100	0.69	106	0	Carassius gibelio	106	1	ACTATGCTCAGCCGTAAACTTAGACATCCTACTACAATAGATGTCCGCCAGGGTACTACGAGCATTAGCTTAAAACCCAAAGGACCTGACGGTGTCTCAGATCCCC
				Zotu12	1492	LOW	99.06	0.41	106	1	Carassius gibelio	106	2	ACTATGCTCAGCCGTAAACTTAGACATCCTACTACAATAGATGTCCGCCAGGGTACTACGAGCATTAGCTTAAAACCCAAAGGACCTGACGGTGTCTCAGACCCCC
11479770_	Blicca bjoerkna	2963	ACTATGCTCAGCCGTAAACTCAGACATCCAGCTACAATTAGACGTCCGCCCGGGTACTACGAGCATTAGCTTGAAACCCAAAGGACCTGACGGTGCCTTAGACCCCC	Zotu13	2963	LOW	98.13	0.29	107	2	Abramis brama	107	3	ACTATGCTCAGCCGTAAACTCAGACATCCAGCTACAATTAGACGTCCGCCCGGGTACTACGAGCATTAGCTTGAAACCCAAAGGACCTGACGGTGCCTTAGACCCCC
11479770_	Phoxinus phoxinus	2927	ACTATGCTCAGTCATAAACCTAGACGTCCTACTACAGCTAGACGTCCGCCCGGGTACTACGAGCGCTTGGCTTGAAACCCAAAGGACCTGACGGTGCCTCAGACCCCC	Zotu10	2927	HIGH	100		108	0				ACTATGCTCAGTCATAAACCTAGACGTCCTACTACAGCTAGACGTCCGCCCGGGTACTACGAGCGCTTGGCTTGAAACCCAAAGGACCTGACGGTGCCTCAGACCCCC
11479770_	Barbatula barbatula	2703	ACTATGCTCAGCCGTAAACCTAGACGTTATACCACTATAAACGTCCGCCCGGGTACTACGAGCGTTAGCTTAAAACCCAAAGGACTTGGCGGTGCCTTAGACCCCC	Zotu9	2703	MODERATE	100	0.69	106	0	Barbatula	106	1	ACTATGCTCAGCCGTAAACCTAGACGTTATACCACTATAAACGTCCGCCCGGGTACTACGAGCGTTAGCTTAAAACCCAAAGGACTTGGCGGTGCCTTAGACCCCC
11479770_	Fulica atra	2092	ACTATGCTTGGCCCTAAATCTAGATACTTCTTCCCCACTAAAGTATCCGCCTGAGAACTACGAGCACAAACGCTTAAAACTCTAAGGACTTGGCGGTGCTCCAAACCCAC	Zotu11	2092	HIGH	100		110	0				ACTATGCTTGGCCCTAAATCTAGATACTTCTTCCCCACTAAAGTATCCGCCTGAGAACTACGAGCACAAACGCTTAAAACTCTAAGGACTTGGCGGTGCTCCAAACCCAC
11479770_	Triturus cristatus	8	ACTATGCCTAGCTATAAACTTTGACCCATATCCGCCAGAGTACTACGAGCAACAGCTTAAAACTCAAAGGACTTGGCGGTGCTCTACACCCAC	Zotu16	8	HIGH	100		93	0				ACTATGCCTAGCTATAAACTTTGACCCATATCCGCCAGAGTACTACGAGCAACAGCTTAAAACTCAAAGGACTTGGCGGTGCTCTACACCCAC
Sample name	Species	Total read	Representative Sequence	Haploid ID	Size	Confidence	Identity(%)	LOD Score	Align Len	Mismatch	2nd-sp Name	2nd-sp Align Len	2nd-sp Mismatch	Sequence
11479771_	Cyprinus carpio	52542	ACTATGCTCAGCCGTAAACTCAGACATCCAGCTACAATTAGATGTCCGCCAGGGTACTACGAGCATTAGCTTAAAACCCAAAGGACCTGACGGTGTCTCAGACCCCC	Zotu1	52542	HIGH	100		107	0				ACTATGCTCAGCCGTAAACTCAGACATCCAGCTACAATTAGATGTCCGCCAGGGTACTACGAGCATTAGCTTAAAACCCAAAGGACCTGACGGTGTCTCAGACCCCC
11479771_	Lepomis gibbosus	14463	ACTATGCCTAGCCCTAAACATTGGTAACACCCTACATCTGTTGCCCGCCAGGAAACTACGAGCATTAGCTTAAAACCCAAAGGACTTGGCGGTGCTTTAGATCCAC	Zotu2	14463	HIGH	99.06		106	1				ACTATGCCTAGCCCTAAACATTGGTAACACCCTACATCTGTTGCCCGCCAGGAAACTACGAGCATTAGCTTAAAACCCAAAGGACTTGGCGGTGCTTTAGATCCAC
11479771_	Homo sapiens	11999	ACTATGCTTAGCCCTAAACCTCAACAGTTAAATCAACAAAACTGCTCGCCAGAACACTACGAGCCACAGCTTAAAACTCAAAGGACCTGGCGGTGCTTCATATCCCT	Zotu3	11999	HIGH	100		107	0				ACTATGCTTAGCCCTAAACCTCAACAGTTAAATCAACAAAACTGCTCGCCAGAACACTACGAGCCACAGCTTAAAACTCAAAGGACCTGGCGGTGCTTCATATCCCT
11479771_	Triturus cristatus	2854	ACTATGCCTAGCTATAAACTTTGACCCATATCCGCCAGAGTACTACGAGCAACAGCTTAAAACTCAAAGGACTTGGCGGTGCTCTACACCCAC	Zotu5	2854	HIGH	100		93	0				ACTATGCCTAGCTATAAACTTTGACCCATATCCGCCAGAGTACTACGAGCAACAGCTTAAAACTCAAAGGACTTGGCGGTGCTCTACACCCAC
11479771_	Anas platyrhynchos	1652	ACTATGCCTGGCCCTAAATCTTGATACTTACCCTACCGAAGTATCCGCCAGAGAACTACGAGCACAAACGCTTAAAACTCTAAGGACTTGGCGGTGCCCTAAACCCAC	Zotu6	1652	LOW	100	0	108	0	Anas clypeata	108	0	ACTATGCCTGGCCCTAAATCTTGATACTTACCCTACCGAAGTATCCGCCAGAGAACTACGAGCACAAACGCTTAAAACTCTAAGGACTTGGCGGTGCCCTAAACCCAC
11479771_	Lota lota	1649	ACTATGTATGGTTGTTAACATTGATGGTTTTATACTTAAACCATCCGCCTGGGTACTACGAGCATTAGCTTAAAACCCAAAGGACTTGGCGGTGCTTTAGACCCCC	Zotu7	1649	HIGH	100		106	0				ACTATGTATGGTTGTTAACATTGATGGTTTTATACTTAAACCATCCGCCTGGGTACTACGAGCATTAGCTTAAAACCCAAAGGACTTGGCGGTGCTTTAGACCCCC
11479771_	Leuciscus leuciscus	1556	ACTATGCTCGGCCGTAAACCTAGACGTCCAGCTACAATTAGACGTCCGCCCGGGTACTACGAGCATTAGCTTGAAACCCAAAGGACCTGACGGTGCCTTAGACCCCC	Zotu8	1336	MODERATE	100	0.69	107	0	Leuciscus idus	107	1	ACTATGCTCGGCCGTAAACCTAGACGTCCAGCTACAATTAGACGTCCGCCCGGGTACTACGAGCATTAGCTTGAAACCCAAAGGACCTGACGGTGCCTTAGACCCCC
				Zotu14	122	LOW	98.13	0.29	107	2	Leuciscus idus	107	3	ACTATGCTCGGCCGTAAACCTAGACGTCCAGCTACAATTAGACGTCCGCCCGGGTACTACGAGCATTAGCTTGAAACCCAAAGGACCTGACGGTGTCTCAGACCCCC
				Zotu16	98	LOW	97.2		107	3				ACTATGCTCGGCCGTAAACCTAGACGTCCAGCTACAATTAGACGTCCGCCCGGGTACTACGAGCATTAGCTTAAAACCCAAAGGACCTGACGGTGTCTCAGACCCCC
11479771_	Phoxinus phoxinus	602	ACTATGCTCAGTCATAAACCTAGACGTCCTACTACAGCTAGACGTCCGCCCGGGTACTACGAGCGCTTGGCTTGAAACCCAAAGGACCTGACGGTGCCTCAGACCCCC	Zotu9	602	HIGH	100		108	0				ACTATGCTCAGTCATAAACCTAGACGTCCTACTACAGCTAGACGTCCGCCCGGGTACTACGAGCGCTTGGCTTGAAACCCAAAGGACCTGACGGTGCCTCAGACCCCC
11479771_	Blicca bjoerkna	267	ACTATGCTCAGCCGTAAACTCAGACATCCAGCTACAATTAGACGTCCGCCCGGGTACTACGAGCATTAGCTTGAAACCCAAAGGACCTGACGGTGCCTTAGACCCCC	Zotu11	267	LOW	98.13	0.29	107	2	Abramis brama	107	3	ACTATGCTCAGCCGTAAACTCAGACATCCAGCTACAATTAGACGTCCGCCCGGGTACTACGAGCATTAGCTTGAAACCCAAAGGACCTGACGGTGCCTTAGACCCCC
Sample name	Species	Total read	Representative Sequence	Haploid ID	Size	Confidence	Identity(%)	LOD Score	Align Len	Mismatch	2nd-sp Name	2nd-sp Align Len	2nd-sp Mismatch	Sequence
11479772_	Cyprinus carpio	42668	ACTATGCTCAGCCGTAAACTCAGACATCCAGCTACAATTAGATGTCCGCCAGGGTACTACGAGCATTAGCTTAAAACCCAAAGGACCTGACGGTGTCTCAGACCCCC	Zotu1	42668	HIGH	100		107	0				ACTATGCTCAGCCGTAAACTCAGACATCCAGCTACAATTAGATGTCCGCCAGGGTACTACGAGCATTAGCTTAAAACCCAAAGGACCTGACGGTGTCTCAGACCCCC
11479772_	Lepomis gibbosus	11096	ACTATGCCTAGCCCTAAACATTGGTAACACCCTACATCTGTTGCCCGCCAGGAAACTACGAGCATTAGCTTAAAACCCAAAGGACTTGGCGGTGCTTTAGATCCAC	Zotu2	11096	HIGH	99.06		106	1				ACTATGCCTAGCCCTAAACATTGGTAACACCCTACATCTGTTGCCCGCCAGGAAACTACGAGCATTAGCTTAAAACCCAAAGGACTTGGCGGTGCTTTAGATCCAC
11479772_	Leuciscus leuciscus	7479	ACTATGCTCGGCCGTAAACCTAGACGTCCAGCTACAATTAGACGTCCGCCCGGGTACTACGAGCATTAGCTTGAAACCCAAAGGACCTGACGGTGCCTTAGACCCCC	Zotu3	7479	MODERATE	100	0.69	107	0	Leuciscus idus	107	1	ACTATGCTCGGCCGTAAACCTAGACGTCCAGCTACAATTAGACGTCCGCCCGGGTACTACGAGCATTAGCTTGAAACCCAAAGGACCTGACGGTGCCTTAGACCCCC
11479772_	Lota lota	4793	ACTATGTATGGTTGTTAACATTGATGGTTTTATACTTAAACCATCCGCCTGGGTACTACGAGCATTAGCTTAAAACCCAAAGGACTTGGCGGTGCTTTAGACCCCC	Zotu5	4793	HIGH	100		106	0				ACTATGTATGGTTGTTAACATTGATGGTTTTATACTTAAACCATCCGCCTGGGTACTACGAGCATTAGCTTAAAACCCAAAGGACTTGGCGGTGCTTTAGACCCCC
11479772_	Homo sapiens	6373	ACTATGCTTAGCCCTAAACCTCAACAGTTAAATCAACAAAACTGCTCGCCAGAACACTACGAGCCACAGCTTAAAACTCAAAGGACCTGGCGGTGCTTCATATCCCT	Zotu6	3822	HIGH	100		107	0				ACTATGCTTAGCCCTAAACCTCAACAGTTAAATCAACAAAACTGCTCGCCAGAACACTACGAGCCACAGCTTAAAACTCAAAGGACCTGGCGGTGCTTCATATCCCT
				Zotu9	2551	HIGH	99.07		107	1				ACTATGCTTAGCCCTAAACCTCAACAGTTAAATCAACAAAACTGCTCGCCAGAACACTACGAGCCACAGCTTAAAACTCAAAGGACCTGGCGGTGCTTCATATTCCT
11479772_	Ctenopharyngodon idella	3068	ACTATGCTCAGCCATAAACCTAGACATCCAACTACAATTAAACGTCCGCCCGGGTACTACGAGCATTAGCTTGAAACCCAAAGGACCTGACGGTGCCTTAGACCCCC	Zotu7	3068	MODERATE	100	0.69	107	0	Hypophthalmichthys molitrix	107	1	ACTATGCTCAGCCATAAACCTAGACATCCAACTACAATTAAACGTCCGCCCGGGTACTACGAGCATTAGCTTGAAACCCAAAGGACCTGACGGTGCCTTAGACCCCC
11479772_	Carassius carassius	3120	ACTATGCTCAGCCGTAAACTTAGACATCCTACTACAATAGATGTCCGCCAGGGTACTACGAGCATTAGCTTAAAACCCAAAGGACCTGACGGTGTCTCAGATCCCC	Zotu8	2695	MODERATE	100	0.69	106	0	Carassius gibelio	106	1	ACTATGCTCAGCCGTAAACTTAGACATCCTACTACAATAGATGTCCGCCAGGGTACTACGAGCATTAGCTTAAAACCCAAAGGACCTGACGGTGTCTCAGATCCCC
				Zotu13	425	LOW	99.06	0.41	106	1	Carassius gibelio	106	2	ACTATGCTCAGCCGTAAACTTAGACATCCTACTACAATAGATGTCCGCCAGGGTACTACGAGCATTAGCTTAAAACCCAAAGGACCTGACGGTGTCTCAGACCCCC
11479772_	Acrocephalus scirpaceus	1170	ACTATGCCTGGCCCTAAATCTTGATGCTTAACCTTACCGAAGCATCCGCCCGAGAACTACGAGCGCAAACGCTTAAAACTCTAAGGACTTGGCGGTGCCCCAAACCCAC	Zotu10	1170	HIGH	100		109	0				ACTATGCCTGGCCCTAAATCTTGATGCTTAACCTTACCGAAGCATCCGCCCGAGAACTACGAGCGCAAACGCTTAAAACTCTAAGGACTTGGCGGTGCCCCAAACCCAC
11479772_	Phoxinus phoxinus	1076	ACTATGCTCAGTCATAAACCTAGACGTCCTACTACAGCTAGACGTCCGCCCGGGTACTACGAGCGCTTGGCTTGAAACCCAAAGGACCTGACGGTGCCTCAGACCCCC	Zotu11	1076	HIGH	100		108	0				ACTATGCTCAGTCATAAACCTAGACGTCCTACTACAGCTAGACGTCCGCCCGGGTACTACGAGCGCTTGGCTTGAAACCCAAAGGACCTGACGGTGCCTCAGACCCCC
11479772_	Anas platyrhynchos	498	ACTATGCCTGGCCCTAAATCTTGATACTTACCCTACCGAAGTATCCGCCAGAGAACTACGAGCACAAACGCTTAAAACTCTAAGGACTTGGCGGTGCCCTAAACCCAC	Zotu12	498	LOW	100	0	108	0	Anas clypeata	108	0	ACTATGCCTGGCCCTAAATCTTGATACTTACCCTACCGAAGTATCCGCCAGAGAACTACGAGCACAAACGCTTAAAACTCTAAGGACTTGGCGGTGCCCTAAACCCAC
11479772_	Fulica atra	17	ACTATGCTTGGCCCTAAATCTAGATACTTCTTCCCCACTAAAGTATCCGCCTGAGAACTACGAGCACAAACGCTTAAAACTCTAAGGACTTGGCGGTGCTCCAAACCCAC	Zotu14	17	HIGH	100		110	0				ACTATGCTTGGCCCTAAATCTAGATACTTCTTCCCCACTAAAGTATCCGCCTGAGAACTACGAGCACAAACGCTTAAAACTCTAAGGACTTGGCGGTGCTCCAAACCCAC
Sample name	Species	Total read	Representative Sequence	Haploid ID	Size	Confidence	Identity(%)	LOD Score	Align Len	Mismatch	2nd-sp Name	2nd-sp Align Len	2nd-sp Mismatch	Sequence
11479773_	Cyprinus carpio	156244	ACTATGCTCAGCCGTAAACTCAGACATCCAGCTACAATTAGATGTCCGCCAGGGTACTACGAGCATTAGCTTAAAACCCAAAGGACCTGACGGTGTCTCAGACCCCC	Zotu1	156244	HIGH	100		107	0				ACTATGCTCAGCCGTAAACTCAGACATCCAGCTACAATTAGATGTCCGCCAGGGTACTACGAGCATTAGCTTAAAACCCAAAGGACCTGACGGTGTCTCAGACCCCC
11479773_	Lepomis gibbosus	36099	ACTATGCCTAGCCCTAAACATTGGTAACACCCTACATCTGTTGCCCGCCAGGAAACTACGAGCATTAGCTTAAAACCCAAAGGACTTGGCGGTGCTTTAGATCCAC	Zotu2	36099	HIGH	99.06		106	1				ACTATGCCTAGCCCTAAACATTGGTAACACCCTACATCTGTTGCCCGCCAGGAAACTACGAGCATTAGCTTAAAACCCAAAGGACTTGGCGGTGCTTTAGATCCAC
11479773_	Leuciscus leuciscus	10848	ACTATGCTCGGCCGTAAACCTAGACGTCCAGCTACAATTAGACGTCCGCCCGGGTACTACGAGCATTAGCTTGAAACCCAAAGGACCTGACGGTGCCTTAGACCCCC	Zotu4	10848	MODERATE	100	0.69	107	0	Leuciscus idus	107	1	ACTATGCTCGGCCGTAAACCTAGACGTCCAGCTACAATTAGACGTCCGCCCGGGTACTACGAGCATTAGCTTGAAACCCAAAGGACCTGACGGTGCCTTAGACCCCC
11479773_	Fulica atra	9832	ACTATGCTTGGCCCTAAATCTAGATACTTCTTCCCCACTAAAGTATCCGCCTGAGAACTACGAGCACAAACGCTTAAAACTCTAAGGACTTGGCGGTGCTCCAAACCCAC	Zotu3	9832	HIGH	100		110	0				ACTATGCTTGGCCCTAAATCTAGATACTTCTTCCCCACTAAAGTATCCGCCTGAGAACTACGAGCACAAACGCTTAAAACTCTAAGGACTTGGCGGTGCTCCAAACCCAC
11479773_	Leuciscus idus	8789	ACTATGCTCGGCCATAAACCTAGACGTCCAGCTACAATTAGACGTCCGCCCGGGTACTACGAGCATTAGCTTGAAACCCAAAGGACCTGACGGTGCCTTAGACCCCC	Zotu5	8789	MODERATE	100	0.69	107	0	Leuciscus leuciscus	107	1	ACTATGCTCGGCCATAAACCTAGACGTCCAGCTACAATTAGACGTCCGCCCGGGTACTACGAGCATTAGCTTGAAACCCAAAGGACCTGACGGTGCCTTAGACCCCC
11479773_	Lota lota	5425	ACTATGTATGGTTGTTAACATTGATGGTTTTATACTTAAACCATCCGCCTGGGTACTACGAGCATTAGCTTAAAACCCAAAGGACTTGGCGGTGCTTTAGACCCCC	Zotu6	5425	HIGH	100		106	0				ACTATGTATGGTTGTTAACATTGATGGTTTTATACTTAAACCATCCGCCTGGGTACTACGAGCATTAGCTTAAAACCCAAAGGACTTGGCGGTGCTTTAGACCCCC
11479773_	Anas platyrhynchos	733	ACTATGCCTGGCCCTAAATCTTGATACTTACCCTACCGAAGTATCCGCCAGAGAACTACGAGCACAAACGCTTAAAACTCTAAGGACTTGGCGGTGCCCTAAACCCAC	Zotu7	733	LOW	100	0	108	0	Anas clypeata	108	0	ACTATGCCTGGCCCTAAATCTTGATACTTACCCTACCGAAGTATCCGCCAGAGAACTACGAGCACAAACGCTTAAAACTCTAAGGACTTGGCGGTGCCCTAAACCCAC
11479773_	Homo sapiens	79	ACTATGCTTAGCCCTAAACCTCAACAGTTAAATCAACAAAACTGCTCGCCAGAACACTACGAGCCACAGCTTAAAACTCAAAGGACCTGGCGGTGCTTCATATCCCT	Zotu8	57	HIGH	100		107	0				ACTATGCTTAGCCCTAAACCTCAACAGTTAAATCAACAAAACTGCTCGCCAGAACACTACGAGCCACAGCTTAAAACTCAAAGGACCTGGCGGTGCTTCATATCCCT
				Zotu11	22	HIGH	99.07		107	1				ACTATGCTTAGCCCTAAACCTCAACAGTTAAATCAACAAAACTGCTCGCCAGAACACTACGAGCCACAGCTTAAAACTCAAAGGACCTGGCGGTGCTTCATATTCCT
11479773_	Ctenopharyngodon idella	32	ACTATGCTCAGCCATAAACCTAGACATCCAACTACAATTAAACGTCCGCCCGGGTACTACGAGCATTAGCTTGAAACCCAAAGGACCTGACGGTGCCTTAGACCCCC	Zotu10	32	MODERATE	100	0.69	107	0	Hypophthalmichthys molitrix	107	1	ACTATGCTCAGCCATAAACCTAGACATCCAACTACAATTAAACGTCCGCCCGGGTACTACGAGCATTAGCTTGAAACCCAAAGGACCTGACGGTGCCTTAGACCCCC
11479773_	Phoxinus phoxinus	9	ACTATGCTCAGTCATAAACCTAGACGTCCTACTACAGCTAGACGTCCGCCCGGGTACTACGAGCGCTTGGCTTGAAACCCAAAGGACCTGACGGTGCCTCAGACCCCC	Zotu12	9	HIGH	100		108	0				ACTATGCTCAGTCATAAACCTAGACGTCCTACTACAGCTAGACGTCCGCCCGGGTACTACGAGCGCTTGGCTTGAAACCCAAAGGACCTGACGGTGCCTCAGACCCCC
Sample name	Species	Total read	Representative Sequence	Haploid ID	Size	Confidence	Identity(%)	LOD Score	Align Len	Mismatch	2nd-sp Name	2nd-sp Align Len	2nd-sp Mismatch	Sequence
11479774_	Cyprinus carpio	56762	ACTATGCTCAGCCGTAAACTCAGACATCCAGCTACAATTAGATGTCCGCCAGGGTACTACGAGCATTAGCTTAAAACCCAAAGGACCTGACGGTGTCTCAGACCCCC	Zotu1	56762	HIGH	100		107	0				ACTATGCTCAGCCGTAAACTCAGACATCCAGCTACAATTAGATGTCCGCCAGGGTACTACGAGCATTAGCTTAAAACCCAAAGGACCTGACGGTGTCTCAGACCCCC
11479774_	Leuciscus leuciscus	12967	ACTATGCTCGGCCGTAAACCTAGACGTCCAGCTACAATTAGACGTCCGCCCGGGTACTACGAGCATTAGCTTGAAACCCAAAGGACCTGACGGTGCCTTAGACCCCC	Zotu2	12967	MODERATE	100	0.69	107	0	Leuciscus idus	107	1	ACTATGCTCGGCCGTAAACCTAGACGTCCAGCTACAATTAGACGTCCGCCCGGGTACTACGAGCATTAGCTTGAAACCCAAAGGACCTGACGGTGCCTTAGACCCCC
11479774_	Homo sapiens	10537	ACTATGCTTAGCCCTAAACCTCAACAGTTAAATCAACAAAACTGCTCGCCAGAACACTACGAGCCACAGCTTAAAACTCAAAGGACCTGGCGGTGCTTCATATCCCT	Zotu3	10537	HIGH	100		107	0				ACTATGCTTAGCCCTAAACCTCAACAGTTAAATCAACAAAACTGCTCGCCAGAACACTACGAGCCACAGCTTAAAACTCAAAGGACCTGGCGGTGCTTCATATCCCT
11479774_	Lepomis gibbosus	4403	ACTATGCCTAGCCCTAAACATTGGTAACACCCTACATCTGTTGCCCGCCAGGAAACTACGAGCATTAGCTTAAAACCCAAAGGACTTGGCGGTGCTTTAGATCCAC	Zotu4	4403	HIGH	99.06		106	1				ACTATGCCTAGCCCTAAACATTGGTAACACCCTACATCTGTTGCCCGCCAGGAAACTACGAGCATTAGCTTAAAACCCAAAGGACTTGGCGGTGCTTTAGATCCAC
11479774_	Carassius carassius	3307	ACTATGCTCAGCCGTAAACTTAGACATCCTACTACAATAGATGTCCGCCAGGGTACTACGAGCATTAGCTTAAAACCCAAAGGACCTGACGGTGTCTCAGATCCCC	Zotu5	2808	MODERATE	100	0.69	106	0	Carassius gibelio	106	1	ACTATGCTCAGCCGTAAACTTAGACATCCTACTACAATAGATGTCCGCCAGGGTACTACGAGCATTAGCTTAAAACCCAAAGGACCTGACGGTGTCTCAGATCCCC
				Zotu9	499	LOW	99.06	0.41	106	1	Carassius gibelio	106	2	ACTATGCTCAGCCGTAAACTTAGACATCCTACTACAATAGATGTCCGCCAGGGTACTACGAGCATTAGCTTAAAACCCAAAGGACCTGACGGTGTCTCAGACCCCC
11479774_	Lota lota	2793	ACTATGTATGATTGTTAACATTGATGGTTTTATACTTAAACCATCCGCCTGGGTACTACGAGCATTAACTTAAAACCCAAAGGACTTGGCGGTGCTTTAGACCCCC	Zotu6	1760	HIGH	99.06		106	1				ACTATGTATGATTGTTAACATTGATGGTTTTATACTTAAACCATCCGCCTGGGTACTACGAGCATTAACTTAAAACCCAAAGGACTTGGCGGTGCTTTAGACCCCC
				Zotu7	1033	HIGH	100		106	0				ACTATGTATGATTGTTAACATTGATGGTTTTATACTTAAACCATCCGCCTGGGTACTACGAGCATTAGCTTAAAACCCAAAGGACTTGGCGGTGCTTTAGACCCCC
11479774_	Phoxinus phoxinus	895	ACTATGCTCAGTCATAAACCTAGACGTCCTACTACAGCTAGACGTCCGCCCGGGTACTACGAGCGCTTGGCTTGAAACCCAAAGGACCTGACGGTGCCTCAGACCCCC	Zotu8	895	HIGH	100		108	0				ACTATGCTCAGTCATAAACCTAGACGTCCTACTACAGCTAGACGTCCGCCCGGGTACTACGAGCGCTTGGCTTGAAACCCAAAGGACCTGACGGTGCCTCAGACCCCC
11479774_	Fulica atra	8	ACTATGCTTGGCCCTAAATCTAGATACTTCTTCCCCACTAAAGTATCCGCCTGAGAACTACGAGCACAAACGCTTAAAACTCTAAGGACTTGGCGGTGCTCCAAACCCAC	Zotu10	8	HIGH	100		110	0				ACTATGCTTGGCCCTAAATCTAGATACTTCTTCCCCACTAAAGTATCCGCCTGAGAACTACGAGCACAAACGCTTAAAACTCTAAGGACTTGGCGGTGCTCCAAACCCAC

## Sheet: Haploids with Low Identities
These Haploids are below the threshold of BLAST identity you defined
Sample name	Haploid ID	Species	Total read	Identity(%)	Align Len	Mismatch	Sequence
11479674_	Zotu12	Rana_catesbeiana	98	95.5056	89	4	ACTATGCTCAGCCGTAAACAATTAATTTACACCAATAAGCGCCAGGGAATTACGAGCAATGCTTAAAACCCAAAGGACCTGACGGTGTCTCAGACCCCC
11479675_	Zotu14	Cyprinus_carpio	325	95.3271	107	5	ACTATGCTCAGCCGTAAACTCAGACATCCAGCTACAATTAGATGTCCGCCAGGGTACTACGAGCATTAGCTTAAAACCCAAAGGACTTGGCGGTGCTTTAGACCCCC
11479675_	Zotu12	Lota_lota	142	95.283	106	5	ACTATGTATGGTTGTTAACATTGATGGTTTTATACTTAAACCATCCGCCTGGGTACTACGAGCATTAGCTTAAAACCCAAAGGACCTGACGGTGTCTCAGACCCCC
11479676_	Zotu15	Barbatula_barbatula	166	96.2264	106	4	ACTATGCTCAGCCGTAAACCTAGACGTTATACCACTATAAACGTCCGCCCGGGTACTACGAGCGTTAGCTTAAAACCCAAAGGACCTGACGGTGTCTCAGACCCCC
11479681_	Zotu16	Cyprinus_carpio	183	96.2617	107	4	ACTATGCTCGGCCGTAAACCTAGACGTCCAGCTACAATTAGATGTCCGCCAGGGTACTACGAGCATTAGCTTAAAACCCAAAGGACCTGACGGTGTCTCAGACCCCC
11479681_	Zotu18	Cyprinus_carpio	163	95.3271	107	5	ACTATGCTCAGCCGTAAACTCAGACATCCAGCTACAATTAGATGTCCGCCAGGGTACTACGAGCATTAGCTTAAAACCCAAAGGACTTGGCGGTGCTTTAGACCCCC
11479681_	Zotu19	Lota_lota	140	95.283	106	5	ACTATGTATGGTTGTTAACATTGATGGTTTTATACTTAAACCATCCGCCTGGGTACTACGAGCATTAGCTTAAAACCCAAAGGACCTGACGGTGTCTCAGACCCCC
11479681_	Zotu20	Lepomis_gibbosus	116	94.2308	104	6	ACTATGCCTAGCCCTAAACATTGGTAACACCCTACATCTGTTGCCCGCCAGGAAACTACGAGCATTAGCTTAAAACCCAAAGGACCTGACGGTGTCTCAGACCCCC
11479682_	Zotu10	Cyprinus_carpio	335	96.2617	107	4	ACTATGCTCGGCCGTAAACCTAGACGTCCAGCTACAATTAGATGTCCGCCAGGGTACTACGAGCATTAGCTTAAAACCCAAAGGACCTGACGGTGTCTCAGACCCCC
11479682_	Zotu15	Cyprinus_carpio	153	95.3271	107	5	ACTATGCTCGGCCATAAACCTAGACGTCCAGCTACAATTAGATGTCCGCCAGGGTACTACGAGCATTAGCTTAAAACCCAAAGGACCTGACGGTGTCTCAGACCCCC
11479682_	Zotu17	Blicca_bjoerkna	20	96.2617	107	4	ACTATGCTCAGCCGTAAACTCAGACATCCAACTACAATTAAACGTCCGCCCGGGTACTACGAGCATTAGCTTGAAACCCAAAGGACCTGACGGTGTCTCAGACCCCC
11479683_	Zotu12	Cyprinus_carpio	257	96.2617	107	4	ACTATGCTCGGCCGTAAACCTAGACGTCCAGCTACAATTAGATGTCCGCCAGGGTACTACGAGCATTAGCTTAAAACCCAAAGGACCTGACGGTGTCTCAGACCCCC
11479683_	Zotu16	Cyprinus_carpio	172	95.3271	107	5	ACTATGCTCGGCCATAAACCTAGACGTCCAGCTACAATTAGATGTCCGCCAGGGTACTACGAGCATTAGCTTAAAACCCAAAGGACCTGACGGTGTCTCAGACCCCC
11479769_	Zotu10	Lepomis_gibbosus	482	94.2308	104	6	ACTATGCCTAGCCCTAAACATTGGTAACACCCTACATCTGTTGCCCGCCAGGAAACTACGAGCATTAGCTTAAAACCCAAAGGACCTGACGGTGTCTCAGACCCCC
11479769_	Zotu9	Cyprinus_carpio	433	96.2617	107	4	ACTATGCTCGGCCGTAAACCTAGACGTCCAGCTACAATTAGATGTCCGCCAGGGTACTACGAGCATTAGCTTAAAACCCAAAGGACCTGACGGTGTCTCAGACCCCC
11479770_	Zotu14	Barbatula_barbatula	290	96.2264	106	4	ACTATGCTCAGCCGTAAACCTAGACGTTATACCACTATAAACGTCCGCCCGGGTACTACGAGCGTTAGCTTAAAACCCAAAGGACCTGACGGTGTCTCAGACCCCC
11479770_	Zotu15	Phoxinus_phoxinus	109	96.2963	108	4	ACTATGCTCGGCCGTAAACCTAGACGTCCTACTACAGCTAGACGTCCGCCCGGGTACTACGAGCGCTTGGCTTGAAACCCAAAGGACCTGACGGTGCCTTAGACCCCC
11479771_	Zotu4	Fulica_atra	3054	95.4545	110	5	ACTATGCTTGGCCTTAAATCTAAATACTTCTCCCCACCAAAGTATTCGCCTGAGAACTACGAGCACAAACGCTTAAAACTCTAAGGACTTGGCGGTGCTCCAAACCCAC
11479771_	Zotu12	Cyprinus_carpio	555	95.3271	107	5	ACTATGCTCAGCCGTAAACTCAGACATCCAGCTACAATTAGATGTCCGCCAGGGTACTACGAGCATTAGCTTAAAACCCAAAGGACTTGGCGGTGCTTTAGACCCCC
11479771_	Zotu10	Lota_lota	206	95.283	106	5	ACTATGTATGGTTGTTAACATTGATGGTTTTATACTTAAACCATCCGCCTGGGTACTACGAGCATTAGCTTAAAACCCAAAGGACCTGACGGTGTCTCAGACCCCC
11479771_	Zotu13	Cyprinus_carpio	161	96.2617	107	4	ACTATGCTCGGCCGTAAACCTAGACGTCCAGCTACAATTAGATGTCCGCCAGGGTACTACGAGCATTAGCTTAAAACCCAAAGGACCTGACGGTGTCTCAGACCCCC
11479771_	Zotu15	Fulica_atra	114	93.6364	110	7	ACTATGCTTGGCCTTAAATCTAAATACTTCTCCCCACCAAAGTATTCGCCTGAGAACTACGAGCACAAACGCTTAAAACTCTAAGGACTTGGCGGTGCCCTAAACCCAC
